# Supplementary material for: Suboptimal vitamin D status in Korean adolescents: a nationwide study on its prevalence, risk factors including cotinine-verified smoking status and association with atopic dermatitis and asthma
Source: PubMed Central journal article supplement — BMJ Open. 2017 Jul 10;7(7):e016409. doi: 10.1136/bmjopen-2017-016409 (PMC5541452; doi:10.1136/bmjopen-2017-016409), 2017-07-10
Supplement: bmjopen-2017-016409.draft_revisions.pdf [file bmjopen-2017-016409.draft_revisions.pdf]

# BMJ Open

## Suboptimal vitamin D status in Korean adolescents: A nation-wide study on its prevalence, risk factors including cotinine verified smoking status and association with atopic dermatitis and asthma

|                                 |                                                                                                     |
|---------------------------------|-----------------------------------------------------------------------------------------------------|
| Journal:                        | <i>BMJ Open</i>                                                                                     |
| Manuscript ID                   | bmjopen-2017-016409                                                                                 |
| Article Type:                   | Research                                                                                            |
| Date Submitted by the Author:   | 12-Feb-2017                                                                                         |
| Complete List of Authors:       | Byun, Eun Jung<br>Heo, Jin Young<br>Cho, Sang Hyun<br>Lee, Jeong Deuk<br>Kim, Hei Sung; Dermatology |
| <b>Primary Subject Heading</b>: | Epidemiology                                                                                        |
| Secondary Subject Heading:      | Dermatology, Smoking and tobacco, Health services research, Paediatrics                             |
| Keywords:                       | vitamin D deficiency, atopic dermatitis, cotinine, smoking, adolescent                              |
|                                 |                                                                                                     |

SCHOLARONE™  
Manuscripts

1  
2  
3  
4 **1 Research**

5  
6 **2 Suboptimal vitamin D status in Korean adolescents: A nation-wide**  
7 **3 study on its prevalence, risk factors including cotinine verified**  
8 **4 smoking status and association with atopic dermatitis and asthma**  
9  
10  
11  
12  
13

14 Eun Jung Byun,<sup>1</sup> Jin Young Heo,<sup>2</sup> Sang Hyun Cho,<sup>1</sup> Jeong Deuk Lee,<sup>1</sup> and Hei Sung Kim<sup>1\*</sup>

15  
16 <sup>1</sup>Department of Dermatology, Incheon St. Mary's Hospital, College of Medicine, The Catholic University of  
17  
18 Korea, Incheon, Korea

19 <sup>2</sup>Department of Preventive Medicine, The Catholic University of Korea, Seoul, Korea  
20  
21  
22  
23  
24

25 **11 Short title: Suboptimal vitamin D status in Korean adolescents**  
26  
27  
28  
29  
30  
31  
32  
33  
34

35 **16 \*Corresponding Author**

36  
37 Hei Sung Kim, MD, PhD

38  
39 Department of Dermatology, Incheon St. Mary's Hospital, The Catholic University of Korea, 56

40  
41 Dongsuro, Bupyeong-gu, 150-713, Incheon, Korea

42  
43 Tel: +82-32-280-5105

44  
45 Fax: +82-32-506-9514

46  
47 E-mail: [hazelkimhoho@gmail.com](mailto:hazelkimhoho@gmail.com)  
48  
49  
50  
51  
52  
53  
54  
55  
56  
57  
58  
59  
60

1  
2  
3  
4 23 **ABSTRACT**

5  
6 24 **Objective:** To determine the prevalence and risk factors for suboptimal vitamin D status in Korean  
7  
8 25 adolescents, and to assess its relationship with atopic dermatitis and asthma.

9  
10 26 **Design:** This is a cross-sectional study with data from the Korean National Health and Nutrition  
11  
12 27 Examination Survey. Information regarding socioeconomic characteristics, clinical data and  
13  
14 28 environmental factors was collected. Blood and urine samples were taken for vitamin D and cotinine  
15  
16 29 respectively. Descriptive and multivariable logistic regression was performed on the data.

17  
18 30 **Setting:** Korea (Nation-wide)

19  
20 31 **Participants:** 2,515 individuals aged 10-18 years who participated in the Korean National Health and  
21  
22 32 Nutrition Examination Survey from 2008-2011.

23  
24 33 **Main outcome measures:** Vitamin D status was determined through measurement of serum 25(OH)D.  
25  
26 34 Smoking status was classified based on the urine cotinine level. Physician diagnosed AD and asthma  
27  
28 35 were assessed using a questionnaire.

29  
30 36 **Results:** Overall, 73.3% of the subjects were vitamin D deficient. Older age ( $p<0.0001$ ), female  
31  
32 37 gender ( $p<0.0001$ ), urban residence ( $p=0.0189$ ), higher body mass index ( $p=0.0034$ ) and sampling in  
33  
34 38 winter months (November-March) ( $p<0.0001$ ) were independently associated with low serum  
35  
36 39 25(OH)D levels. With cotinine verification, 18.2% of the participants were classified as active  
37  
38 40 smokers, 43.4% passive smokers, and 38.4% non-smokers. After adjusting for potential cofounders,  
39  
40 41 serum 25(OH)D status showed no association with AD or asthma at the national level.

41  
42 42 **Conclusion:** Vitamin D deficiency is highly prevalent in Korean adolescents, which should be a  
43  
44 43 matter of public health concern. The cotinine-verified prevalence of smoking was also high in this  
45  
46 44 population, but its relationship with vitamin D deficiency was not confirmed in our study. Our results  
47  
48 45 provide epidemiologic evidence against the association of vitamin D status with AD and asthma at the  
49  
50 46 national level among Korean adolescents.

1  
2  
3  
4 47 **Article summary**

5  
6 48 **Strengths and limitations of this study**

7  
8 49 One of the first studies to identify the prevalence and risk factors for vitamin D deficiency in Korean  
9  
10 50 adolescents.

11 51 The relationship of vitamin D with AD and asthma were assessed at a national level.

12 52 Cotinine-verified smoking status was adopted in this study.

13  
14 53 Limitations of the study include its cross-sectional design and lack of data on dietary and  
15  
16 54 supplemental vitamin D intake.

17  
18 55 Also, the study has recall bias because diagnoses of allergic conditions (AD and asthma) were self-  
19  
20 56 reported.

21  
22  
23  
24 57  
25  
26  
27  
28  
29  
30  
31  
32  
33  
34  
35  
36  
37  
38  
39  
40  
41  
42  
43  
44  
45  
46  
47  
48  
49  
50  
51  
52  
53  
54  
55  
56  
57  
58  
59  
60

## 58 INTRODUCTION

59 Vitamin D is essential for skeletal health and bone growth and its deficiency has been associated with  
60 skeletal deformities in children and fracture risk in adults. Recent studies have also identified the  
61 previously unanticipated roles of vitamin D in the immune system, cardiovascular system and cancer  
62 prevention.<sup>1,2</sup> Despite growing health concerns over low vitamin D status, few nation-wide studies  
63 have been performed to evaluate vitamin D deficiency in the Korean pediatric population.<sup>3,4</sup>  
64 Suboptimal vitamin D level was reported in 70% of the US children (9% vitamin D deficient, 61%  
65 vitamin D insufficient),<sup>5</sup> and it was found in 41.7% of the children from New Zealand).<sup>6</sup> Korean  
66 adolescents are theoretically at increased risk for vitamin D deficiency because of the high latitude  
67 (34-38°N), culturally vigorous sun protection, reduced outdoor activity and lack of vitamin D-fortified  
68 food.

69 The increasing prevalence of allergic diseases is a world-wide phenomenon and it is strikingly more  
70 evident in the younger population compared to adults.<sup>7</sup> Vitamin D has immunomodulatory functions,  
71 and its relationship with allergic disease has been evaluated in a number of studies.<sup>8-15</sup> While some  
72 authors have reported about the protective role of vitamin D in atopic dermatitis (AD), asthma,  
73 allergic rhinitis (AR) and allergic sensitization in childhood, other authors have shown a deleterious  
74 effect. Although the exact cause of such conflicting results is not known, racial difference may be a  
75 contributing factor. Unfortunately, there are limited nation-wide studies on vitamin D and allergic  
76 disease and they were mainly performed in western countries.

77 In this study, we aimed to identify the prevalence and risk factors for vitamin D deficiency in Korean  
78 adolescents and to assess its relationship with AD and asthma at the national level. Cotinine-verified  
79 smoking status was adopted in this study.

## 80 **METHODS**

### 81 **Study population**

82 This study was based on data acquired from the Korean National Health and Nutrition Examination  
83 Survey (KNHANES), a survey conducted by the Korea Centers for Disease Control and Prevention to  
84 provide nationally representative and reliable statistical data regarding the health, behavior associated  
85 with health, nutrition, and food intake status of the Korean population. Data were collected from 2008  
86 to 2011, which corresponds to the second and third year of KNHANES IV (2007-2009) and the first  
87 and second year of KNHANES V (2010-2012). The survey included a health interview, a nutritional  
88 survey, physical examination, and blood and urine tests. The institutional review board at the Korea  
89 Centers for Disease Control and Prevention approved the protocol, and all participants signed  
90 informed consent forms.

91 Both KNHANES IV and V adopted the stratified multistage cluster sampling design by using the  
92 rolling-survey sampling method. The rolling sample collected each year is the probability sample  
93 representing the general Korean population, and it is homogeneous and independent of each other. In  
94 2008, 2009, 2010 and 2011, a total of 37,753 individuals were sampled. The study population was  
95 further limited to 4,598 adolescents aged 10-18 years. Among the 4,598 participants, we subsequently  
96 excluded the following participants: those whose 25(OH)D levels were not measured; those without  
97 urine cotinine levels; those who did not completely answer the questions regarding AD or asthma;  
98 those without body mass index (BMI) measurement; and those who had a chronic disease that may  
99 affect vitamin D metabolism. Finally, a total of 2,515 participants (1,314 males and 1,201 females)  
100 were eligible for analysis.

### 101 **Study variables**

102 Blood samples were collected from the antecubital vein, refrigerated immediately, transported to the  
103 central testing facility in cold storage, and analyzed within 24 hours of sampling. Serum 25(OH)D  
104 levels were measured as described previously<sup>16</sup> and categorized as sufficient ( $\geq 30$  ng/mL), insufficient  
105 (20-29.9 ng/mL) or deficient ( $< 20$  ng/mL).<sup>17</sup>

106 Factors were categorized to analyze the risk factors for vitamin D deficiency. Age and BMI were

1  
2  
3  
4 107 continuous variables while season of sampling was categorized into winter months (November-  
5  
6 108 March) and summer months (April-October).<sup>18</sup> The region of residence of each participant was  
7  
8 109 grouped as follows: urban (Seoul, Gyeonggi, Busan, Daegu, Incheon, Gwangju, Daejeon, and Ulsan)  
9  
10 110 and rural (Gangwon, Chungbuk, Chungnam, Jeonbuk, Jeonnam, Gyeongbuk, Gyeongnam, and  
11  
12 111 Jeju).<sup>19</sup> Monthly income was standardized according to the number of family members (monthly  
13  
14 112 income/number of family members) and it was divided into the following 4 quartile groups: lowest,  
15  
16 113 lower middle, higher middle, and highest. Participants who performed moderate physical activity for  
17  
18 114 more than 30 minutes per day on more than 5 days a week and/or strenuous physical activity for more  
19  
20 115 than 20 minutes per day on more than 3 days a week were assigned to the regular exercise group.  
21  
22 116 Regular walking was designated as “yes” for those who walked for more than 30 minutes per day on  
23  
24 117 more than 5 days a week.<sup>19</sup> Smoking status was divided into three groups based on the urine cotinine  
25  
26 118 level, which are as follows: non-smokers (<5 ng/mL), passive smokers (secondhand smoking) (5-100  
27  
28 119 ng/mL) and active smokers (>100 ng/mL).<sup>19-21</sup> Urine cotinine level was measured by chromatography  
29  
30 120 mass spectrometry using the Perkin Elmer Clarus 600T (PerkinElmer, Turku, Finland). All data were  
31  
32 121 measured in a standardized manner and reviewed by the central quality control center.

33  
34 122 The following question was used to assess physician-diagnosed AD in each participant: “Have you  
35  
36 123 been diagnosed with AD by a doctor?” or “Have you been told by a doctor that (your child) had AD?”  
37  
38 124 Physician-diagnosed asthma was also determined using similar questions.

#### 39 40 41 125 **Statistical analysis**

42  
43 126 Statistical analyses were performed using an SAS survey procedure (version 9.2; SAS Institute, Inc.,  
44  
45 127 Cary, NC, USA), and 2-sided *p* values of less than 0.05 were considered statistically significant. To  
46  
47 128 produce unbiased national estimates representing the general Korean population, we used KNHANES  
48  
49 129 sample weights accounting for the complex sampling design to each participant.

50  
51 130 To compare the mean serum 25(OH)D levels among categories of each possible predicting factor,  
52  
53 131 Student’s *t*-test or ANOVA (followed by Tukey-Kramer for multiple comparison) was used.

54  
55 132 Univariate analysis was performed to evaluate the association of the possible predicting factors, AD  
56  
57 133 and asthma with vitamin D deficiency. Participants’ characteristics were described using means and  
58  
59  
60

1  
2  
3  
4 134 standard errors for continuous variables and numbers and percentages for categorical variables. Here,  
5  
6 135 the Student's *t*-test or ANOVA was used for comparing continuous variables, as appropriate, and Rao-  
7  
8 136 Scott  $\chi^2$  test was used for comparing categorical variables. Variables with a *p*-value <0.05 in  
9  
10 137 univariate analyses were included in the multivariate regression model for exploring factors  
11  
12 138 associated with serum 25(OH)D.

13  
14 139 To estimate the mean serum 25(OH)D levels in participants with and without AD and asthma, we  
15  
16 140 performed simple and multiple linear regression analyses using the generalized linear model for a  
17  
18 141 complex survey design. The estimated means were calculated as follows: no adjustment for potential  
19  
20 142 confounders; and confounder adjustment for age, gender, region, BMI, smoking, and season of  
21  
22 143 sampling.

23  
24 144 To estimate the odds ratios (ORs) for AD and asthma according to quartiles of serum 25(OH)D levels,  
25  
26 145 we conducted simple and multivariate logistic regression analyses by using the generalized linear  
27  
28 146 model for a complex survey design. The ORs and 95% CIs were calculated in the following ways: no  
29  
30 147 adjustment for potential confounders; and confounder adjustment for age, gender, region, BMI,  
31  
32 148 smoking, and season of sampling.  
33  
34  
35  
36  
37  
38  
39  
40  
41  
42  
43  
44  
45  
46  
47  
48  
49  
50  
51  
52  
53  
54  
55  
56  
57  
58  
59  
60



## 149 RESULTS

### 150 General characteristics

151 A total of 2,515 subjects (1,314 males and 1,201 females, age:  $14.4 \pm 0.1$  years) were included in the  
152 study. Table 1 summarizes the baseline data of the participants. The mean BMI of the study  
153 population was  $20.9 \text{ kg/m}^2$  (SE: 0.1). Blood samples were drawn more frequently in April-October  
154 (58.4%) than in November-March (41.62%). The urine cotinine-verified smoking statuses were as  
155 follows: active smoking 18.2%, passive smoking 43.4%, and non-smoking 38.4%. The prevalences of  
156 AD and asthma in the study population were 10.6% and 4.1%, respectively.

### 157 Serum 25(OH)D levels in the study population

158 The mean concentration of serum 25(OH)D in the 2,515 subjects was  $16.7 \text{ ng/mL}$  (SE: 0.2), with a  
159 range of 3.0 to  $46.2 \text{ ng/mL}$ . Overall, 1,843 subjects (73.3%) were vitamin D deficient, 613 subjects  
160 (24.4%) were vitamin D insufficient, and 59 subjects (2.3%) were vitamin sufficient (Figure). Girls  
161 had a significantly lower mean serum 25(OH)D level than boys ( $16.0 \pm 0.2 \text{ ng/mL}$  vs  $17.3 \pm 0.2$   
162  $\text{ng/mL}$ ,  $p < 0.0001$ ), and subjects sampled in winter months (November-March) had lower serum  
163 25(OH)D levels than those sampled in summer months (April-October) ( $14.7 \pm 0.2 \text{ ng/mL}$  vs  $18.1 \pm$   
164  $0.2 \text{ ng/mL}$ ,  $p < 0.0001$ ). Passive smoking (vs non-smoking) and urban residence (vs rural) were also  
165 associated with statistically lower serum 25(OH)D levels ( $p = 0.0382$  and  $p = 0.0024$ , respectively)  
166 (Table 2).

### 167 Univariate and multivariate analyses of factors associated with serum 25(OH)D

168 Univariate analysis revealed that age ( $p < 0.0001$ ), gender ( $p = 0.0031$ ), region of residence ( $p = 0.0108$ ),  
169 season of sampling ( $p < 0.0001$ ), BMI ( $< 0.0001$ ) and smoking status ( $p = 0.0075$ ) were associated with  
170 vitamin D deficiency (Table 1).

171 Multivariate linear regression analysis of serum 25(OH)D levels was performed using variables that  
172 had a  $p$ -value  $< 0.05$  in univariate analyses. Older age ( $p < 0.0001$ ), female gender ( $p < 0.0001$ ), urban  
173 residence ( $p = 0.0189$ ), higher BMI ( $p = 0.0034$ ) and sampling in winter months (November-March)  
174 ( $p < 0.0001$ ) were independently associated with low serum 25(OH)D levels (Table 3). Multivariate  
175 ordinal logistic regression analysis of serum 25(OH)D showed similar results (Table 4).

1  
2  
3  
4 176 **Relationship of serum 25(OH)D with AD and asthma**

5  
6 177 Univariate analysis demonstrated that vitamin D deficiency was not significantly associated with AD  
7  
8 178 ( $p=0.4675$ ) or asthma ( $p=0.5376$ ) (Table 1).

9  
10 179 Multivariate logistic regression showed that vitamin D deficiency had no association with AD and  
11  
12 180 asthma after adjusting for age, gender, region of residence, BMI, smoking, and season of sampling.

13  
14 181 The adjusted odds ratio for AD and asthma increased across categories of serum 25(OH)D (1.00  
15  
16 182 [reference] for  $\geq 30$  ng/mL, 1.14 and 4.87 each for 20-29.9 ng/mL, and 1.52 and 5.31, respectively for  
17  
18 183  $<20$  ng/mL), but it was not statistically significant ( $p=0.8078$  (AD) and  $p=0.1360$  (asthma) for 20-29.9  
19  
20 184 ng/mL and  $p=0.4271$  (AD) and  $p=0.1042$  (asthma) for  $<20$  ng/mL) (Table 6).

21  
22 185 Univariate or multivariate analyses with serum 25(OH)D levels as a continuous variable showed  
23  
24 186 similar results, regardless of the adjustment (Table 6).  
25  
26  
27  
28  
29  
30  
31  
32  
33  
34  
35  
36  
37  
38  
39  
40  
41  
42  
43  
44  
45  
46  
47  
48  
49  
50  
51  
52  
53  
54  
55  
56  
57  
58  
59  
60

**DISCUSSION**

Vitamin D deficiency has been reported to be highly prevalent in a number of countries<sup>1</sup> and there are studies suggesting a possible link between vitamin D status and allergic diseases.<sup>8-15</sup> In this study, we examined the prevalence of vitamin D deficiency in Korean adolescents and set out to determine its relationship with AD and asthma at the national level. Our study results emphasize a public health issue and suggest that a substantial proportion of Korean children are vitamin D deficient. It is significant in those who are older in age, females, who live in the city, have a higher BMI and subjects sampled in winter months (November-March). Our findings are in line with those from prior studies<sup>3,4</sup> which also claimed that lack of vitamin D supplementation and parental vitamin D deficiency are risk factors for vitamin D deficiency in Korean adolescents. With respect to the relationship with allergic diseases, our data does not support association of vitamin D status with AD and asthma.

This nation-wide study is meaningful as it is the first to measure both serum 25(OH)D and urine cotinine in a population of 2,515 Korean adolescents. Smoking has been quoted as a significant determinant of serum 25(OH)D in a number of studies<sup>20-23</sup> including the one from Taiwan,<sup>23</sup> where passive smoking was independently associated with low serum 25(OH)D. To identify the effect of smoking on serum 25(OH)D in Koreans, we adopted urine cotinine, which is presently the biomarker of choice for assessing tobacco smoke exposure.<sup>24-27</sup> KNHANES normally assesses a person's smoking status via a survey. For those who are aged 19 years and above, detailed questions are asked regarding the presence and history of active and passive smoking, but for those who are aged less than 19 years, the questions are much more limited. There is currently no data with regards to passive smoking in Korean adolescents and the survey only determines the presence of active smoking in subjects aged between 12-18 years. Omissions and false responses are common in this age group<sup>28</sup> which impede accurate assessment of smoking status, and in order to improve accuracy, we adopted the cotinine-verified smoking status in our study. Urine cotinine level was measured for a limited time period (2008-2011) and this measurement has only been performed for those aged 10 years and above, which resulted in an inevitable reduction of our study population. We used a urine cotinine cut off value of more than 100 ng/mL to discriminate smokers from non-smokers and 5 ng/mL as a threshold

1  
2  
3  
4 214 for non-smokers exposed to secondhand smoking based on published values.<sup>24-26</sup> With cotinine  
5  
6 215 verification, 18.2% of the participants were classified as active smokers, 43.4% of the participants  
7  
8 216 were classified as passive smokers, and 38.4% of the participants were classified as non-smokers,  
9  
10 217 where the percentage of smokers (active and passive) was higher than what we expected.  
11  
12 218 In this study, the mean concentration of serum 25(OH)D was 16.7 ng/mL with 73.3% of the subjects  
13  
14 219 being vitamin D deficient (serum 25(OH)D <20 ng/mL). Potential explanations for this remarkably  
15  
16 220 low vitamin D status observed in Korean children include, but are not limited to pigmented skin (skin  
17  
18 221 pigmentation is known to reduce the skin's production of vitamin D in East Asian populations),<sup>3</sup>  
19  
20 222 vigorous use of sunscreens and possibly dietary factors. The Dietary Reference Intakes for vitamin D  
21  
22 223 from the Institute of Medicine (2010) and the American Academy of Pediatrics state that the Adequate  
23  
24 224 Intake (AI) of vitamin D is 15 µg/day for children.<sup>29,30</sup> However, in the Dietary Reference Intakes for  
25  
26 225 vitamin D for Koreans published in 2010, the AI of vitamin D for children is claimed to be 5 µg/day,<sup>31</sup>  
27  
28 226 which we feel is too low. Our study results call for careful consideration of vitamin D  
29  
30 227 supplementation, particularly in at-risk children to further optimize their health.  
31  
32 228 Exposure to sunlight, specifically UVB, leads to vitamin D synthesis in the skin, which provides most  
33  
34 229 of the vitamin D requirement of an individual. In Korea (latitude: 34-38°N), vitamin D is synthesized  
35  
36 230 mostly between April and October (summer months),<sup>32</sup> which was apparent in our study.  
37  
38 231 The finding of an inverse relationship of age, female gender, urban residence, and BMI with vitamin  
39  
40 232 D status is in accordance with previous studies.<sup>3,4,23,33,34</sup> It has been previously shown that there is a  
41  
42 233 consistent decline in physical outdoor activity over the school age years. The prevalence of physical  
43  
44 234 inactivity is higher in girls than in boys and it is greater in obese children than in their normal-weight  
45  
46 235 peers. The lifestyle in big cities is also sedentary, and it is therefore possible that age, gender, place of  
47  
48 236 residence and BMI may act as surrogate indicators for sunlight exposure through their association  
49  
50 237 with physical activity. In addition to limited sunlight exposure due to physical inactivity, the inverse  
51  
52 238 association of BMI and urban residence with vitamin D levels can be explained by sequestration of  
53  
54 239 vitamin D in fat tissues<sup>35</sup> and UVB blockade due to air pollution.  
55  
56 240 Smokers have been reported to have a significantly higher risk of vitamin D deficiency,<sup>20-23</sup> but this  
57  
58  
59  
60

1  
2  
3  
4 241 was not confirmed in our study. Since active smoking is usually done outdoors, this can result in  
5  
6 242 greater exposure to sunlight which may alter the true effect of smoking on serum 25(OH)D. Passive  
7  
8 243 smoking in adolescents is more likely to occur indoors, and interestingly enough, passive smoking  
9  
10 244 was reported to be independently associated with low serum 25(OH)D in Taiwanese  
11  
12 245 children/adolescents.<sup>23</sup> Results can also be influenced by cotinine cut-off values and higher thresholds  
13  
14 246 such as 10 ng/mL or 30 ng/mL may be considered in the future when testing children as this  
15  
16 247 population can have higher cotinine concentrations than adults due to differences in body distribution  
17  
18 248 and nicotine metabolism.<sup>36</sup>  
19  
20 249 There is accumulating evidence indicating that an adequate concentration of vitamin D is protective  
21  
22 250 against allergic disease in children.<sup>37,38</sup> However, most of these findings have been reported in western  
23  
24 251 countries and only a few studies have been performed in Asia. We consider our investigation  
25  
26 252 important because differences among ethnicities and subjects of various age groups can possibly  
27  
28 253 affect the results.  
29  
30 254 In this national level study, AD and asthma were not associated with serum 25(OH)D. The present  
31  
32 255 study results, as well as previous studies showing an association between high vitamin D levels and  
33  
34 256 AD, raise questions on the suggestion that vitamin D may be used to prevent or treat AD. In fact, a  
35  
36 257 Cochrane review found no evidence for an effect of vitamin D supplementation on AD.<sup>39</sup> The  
37  
38 258 beneficial effect of sunlight on AD has been well documented, but this is probably due to the anti-  
39  
40 259 inflammatory and antimicrobial effects of UV and not those of vitamin D.  
41  
42 260 Consistent with our results, Hollams *et al.*<sup>40</sup> showed no significant cross-sectional association between  
43  
44 261 serum vitamin D levels and current asthma in 6- or 14-year-old children in UK. Further studies  
45  
46 262 examining the role of serum 25(OH)D levels as predictors of subsequent asthma are needed during the  
47  
48 263 longitudinal follow-up of cohort subjects.  
49  
50 264 The prevalences of AD and asthma in the present study (10.6% and 4.1%, respectively) differed  
51  
52 265 slightly from those in the other population-based studies in Taiwan<sup>23</sup> and Japan.<sup>41</sup> The variation in  
53  
54 266 prevalence in different countries may be caused by several factors, including genetic, socioeconomic  
55  
56 267 and environmental factors.  
57  
58  
59  
60

1  
2  
3  
4 268 This study has several notable strengths. The sampling of adolescents across a broad age range, a  
5  
6 269 large sample size with robust data collection, incorporation of objective markers of smoking status,  
7  
8 270 and a thorough analysis strengthen the results of this study. Limitations of the study include its cross-  
9  
10 271 sectional design and lack of data on dietary and supplemental vitamin D intake. Also, the study is  
11  
12 272 prone to recall bias because diagnoses of allergic conditions (AD and asthma) were self-reported.

### 14 273 **CONCLUSION**

15  
16 274 Vitamin D deficiency is highly prevalent in Korean adolescents. It is a significant public health  
17  
18 275 concern, and optimal vitamin D intakes to maintain sufficient vitamin D status should be examined.  
19  
20 276 The cotinine-verified prevalence of smoking was also high in this population, but its relationship with  
21  
22 277 vitamin D deficiency was not confirmed in our study. Above all, our results provide epidemiologic  
23  
24 278 evidence against the association of vitamin D status with atopic dermatitis and asthma in Korean  
25  
26 279 adolescents. The finding is obtained at the national level and is meaningful, but at the same time, it  
27  
28 280 merits further study.

1  
2  
3  
4 281 **Acknowledgements** This study was supported by a grant of the Korean Healthcare technology R&D  
5  
6 282 project, Ministry of Health & Welfare, Republic of Korea (Grant No.: HN15C0105). The funders had  
7  
8 283 no role in study design, collection, analysis and interpretation of data, writing of the manuscript, or  
9  
10 284 decision to submit for publication.  
11

12 285

13  
14 286 **Contributors** EJB, SHC, JDL, and HSK made substantial contributions to the conception or design of  
15  
16 287 the work. JYH and HSK had role in the acquisition, analysis and interpretation of data for the work.  
17  
18 288 EJB, SHC, JDL, and HSK drafted and revised the work and all authors gave final approval and agreed  
19  
20 289 to be accountable for all aspects of the work.  
21

22 290

23  
24 291 **Funding** This study was supported by a grant of the Korean Healthcare technology R&D project,  
25  
26 292 Ministry of Health & Welfare, Republic of Korea (Grant No.: HN15C0105)  
27

28 293

29  
30 294 **Competing interests** None declared.  
31

32 295

33  
34 296 **Ethics approval** The institutional review board at the Korea Centers for Disease Control and  
35  
36 297 Prevention approved the protocol  
37

38 298

39  
40 299 **Data sharing statement** All data from the study, published and unpublished, are available to the  
41  
42 300 principle investigators. The data are managed under the Department of Dermatology, Incheon St.  
43  
44 301 Mary's Hospital, The Catholic University of Korea, Incheon, Korea.  
45

46 302  
47  
48  
49  
50  
51  
52  
53  
54  
55  
56  
57  
58  
59  
60

## 303 REFERENCES

- 304 1. Holick MF. Vitamin D deficiency. *N Engl J Med* 2007; 257: 266-81.
- 305 2. Cheng HM, Kim S, Park GH, et al. Low vitamin D levels are associated with atopic dermatitis, but not  
306 allergic rhinitis, asthma, or IgE sensitization, in the adult Korean population. *J Allergy Clin Immunol*  
307 2014; 133: 1048-55.
- 308 3. Kim SH, Oh MK, Namgung R, et al. Prevalence of 25-hydroxyvitamin D deficiency in Korean  
309 adolescents: association with age, season, and parental vitamin D status. *Public Health Nutr* 2014; 17:  
310 122-30.
- 311 4. Lee YA, Kim HY, Hong H, et al. Risk factors for low vitamin D status in Korean adolescents: the  
312 Korea National Health and Nutrition Examination Survey (KNHANES) 2008-2009. *Public Health*  
313 *Nutr* 2014; 17: 764-71.
- 314 5. Kumar J, Muntner P, Kaskel FJ, et al. Prevalence and associations of 25-hydroxyvitamin D deficiency  
315 in US children: NHANES 2001-2004. *Pediatrics* 2009; 124: e362-70.
- 316 6. Rockell JE, Green TJ, Skeaff CM, et al. Season and ethnicity are determinants of serum 25-  
317 hydroxyvitamin D concentrations in New Zealand children aged 5-14 y. *J Nutr* 2005; 135: 2602-8.
- 318 7. Asher MI, Montefort S, Bjorksten B, et al. Worldwide time trends in the prevalence of symptoms of  
319 asthma, allergic rhino-conjunctivitis, and eczema in childhood: ISAAC Phases One and Three repeat  
320 multi-country cross-sectional surveys. *Lancet* 2006; 26: 733-43.
- 321 8. Bener A, Ehlayel MS, Tulic MK, et al. Vitamin D deficiency as a strong predictor of asthma in  
322 children. *Int Arch Allergy Immunol* 2012; 157: 168-75.
- 323 9. Wjst M, Hypponen E. Vitamin D serum levels and allergic rhinitis. *Allergy* 2007; 62: 1085-6.
- 324 10. El Taieb MA, Fayed HM, Aly SS, et al. Assessment of serum 25-hydroxyvitamin D levels in children  
325 with atopic dermatitis: correlation with SCORAD index. *Dermatitis* 2013; 24: 296-301.
- 326 11. Sharief S, Jariwala S, Kumar J, et al. Vitamin D levels and food and environmental allergies in the  
327 United States: results from the National Health and Nutrition Examination Survey 2005-2006. *J*  
328 *Allergy Clin Immunol* 2011; 127: 1195-202.
- 329 12. Berents TL, Lodrup Carlsen KC, Mowinckel P, et al. Vitamin D levels and atopic eczema in infancy  
330 and early childhood in Norway: a cohort study. *Br J Dermatol* 2016; 175: 95-101.
- 331 13. Barman M, Jonsson K, Hesselmar B, et al. No association between allergy and current 25-  
332 hydroxyvitamin D in serum or vitamin D intake. *Acta Paediatr* 2015; 104: 405-13.



- 1  
2  
3  
4 333 14. Chiu YE, Havens PL, Siegel DH, *et al.* Serum 25-hydroxyvitamin D concentration does not correlate  
5 334 with atopic dermatitis severity. *J Am Acad Dermatol* 2013; 69: 40-6.  
6  
7 335 15. Yang HK, Choi J, Kim WK, *et al.* The association between hypovitaminosis D and pediatric allergic  
8 336 disease: A Korean nationwide population-based study. *Allergy Asthma Proc* 2016; 37: 64-9.  
9  
10 337 16. Nam GE, Kim DH, Cho KH, *et al.* 25-Hydroxyvitamin D insufficiency is associated with  
11 338 cardiometabolic risk in Korean adolescents: the 2008-2009 Korea National Health and Nutrition  
12 339 Examination Survey (KNHANES). *Public Health Nutr* 2014; 17: 186-94.  
13  
14 340 17. Holick MF, Binkley NC, Bischoff-Ferrari HA, *et al.* Evaluation, treatment, and prevention of vitamin  
15 341 D deficiency: An Endocrine Society clinical practice guideline. *J Clin Endocrinol Metab* 2011; 96:  
16 342 1911-30.  
17  
18 343 18. McKinney K, Breitkopf CR, Berenson AB. Association of race, body fat and season with vitamin D  
19 344 status among young women: a cross-sectional study. *Clin Endocrinol (Oxf)* 2008; 69: 535-41.  
20  
21 345 19. Choi HS, Oh HJ, Choi H, *et al.* Vitamin D insufficiency in Korea- a greater threat to younger  
22 346 generation: The Korea National Health and Nutrition Examination Survey (KNHANES) 2008. *J Clin*  
23 347 *Endocrinol Metab* 2011; 96: 643-51.  
24  
25 348 20. Kassi EN, Stavropoulos S, Kokkoris P, *et al.* Smoking is a significant determinant of low serum  
26 349 vitamin D in young and middle-aged healthy males. *Hormones (Athens)* 2015; 14: 245-50.  
27  
28 350 21. Manavi KR, Alston-Mills BP, Thompson MP, *et al.* Effect of serum cotinine on vitamin D serum  
29 351 concentrations among American females with different ethnic backgrounds. *Anticancer Res* 2015; 35:  
30 352 1211-8.  
31  
32 353 22. Cutillas-Marco E, Fuertes-Prosper A, Grant WB, *et al.* Vitamin D deficiency in South Europe: effect of  
33 354 smoking and aging. *Photodermatol Photoimmunol Photomed* 2012; 28: 159-61.  
34  
35 355 23. Yao TC, Tu YL, Chang SW, *et al.* Suboptimal vitamin D status in a population-based study of Asian  
36 356 children: prevalence and relation to allergic disease and atopy. *PLoS One* 2014; 9: e99105  
37  
38 357 24. Jeong BY, Lim MK, Yun EH, *et al.* Tolerance for and potential indicators of second-hand smoke  
39 358 exposure among nonsmokers: a comparison of self-reported and cotinine verified second-hand smoke  
40 359 exposure based on nationally representative data. *Prev Med* 2014; 67: 280-7.  
41  
42 360 25. Jung S, Lee IS, Kim SB, *et al.* Urine cotinine for assessing tobacco smoke exposure in Korea: Analysis  
43 361 of the Korea National Health and Nutrition Examination Survey (KNHANES). *Tuberc Respir Dis*  
44 362 *(Seoul)* 2012; 73: 210-8.  
45  
46  
47  
48  
49  
50  
51  
52  
53  
54  
55  
56  
57  
58  
59  
60

- 1  
2  
3  
4 363 26. Florescu A, Ferrence R, Einarson T, *et al.* Methods for quantification of exposure to cigarette smoking  
5 364 and environmental tobacco smoke: focus on developmental toxicology. *Ther Drug Monit* 2009; 31: 14-  
6 365 30.  
7  
8  
9 366 27. Kim Y, Choi YJ, Oh SW, *et al.* Discrepancy between self-reported and urine-cotinine verified smoking  
10 367 status among Korean male adults: analysis of health check-up data from a single private hospital.  
11 368 *Korean J Fam Med* 2016; 37: 171-6.  
12  
13 369 28. Park MB, Nam EW, Lee SK, *et al.* The correlation of different cotinine levels with questionnaire  
14 370 results: A comparative study for different measurement methods of the adolescent smoking rate in  
15 371 Korea. *Asia Pac J Public Health* 2015; 27: 542-50.  
16  
17 372 29. Wagner CL, Greer FR. Prevention of rickets and vitamin D deficiency in infants, children, and  
18 373 adolescents. *Pediatrics* 2008; 122: 1142-52.  
19  
20 374 30. Ross AC, Manson JE, Abrams SA, *et al.* The 2011 report on dietary reference intakes for calcium and  
21 375 vitamin D from the institute of medicine: what clinicians needs to know. *J Clin Endocrinol Metab*  
22 376 2011; 96: 53-8.  
23  
24 377 31. Ryou E. Adolescent nutrition: what do pediatricians do? *Korean J Pediatr* 2011; 54: 287-91.  
25  
26 378 32. Chung IH, Kim HJ, Chung S, *et al.* Vitamin D deficiency in Korean children: prevalence, risk factors,  
27 379 and the relationship with parathyroid hormone levels. *Ann Pediatr Endocrinol Metab* 2014; 19: 86-90.  
28  
29 380 33. Carpenter TO, Herreros F, Zhang JH, *et al.* Demographic, dietary, and biochemical determinants of  
30 381 vitamin D status in inner-city children. *Am J Clin Nutr* 2012; 95: 137-46.  
31  
32 382 34. Tolppanen AM, Fraser A, Fraser WD, *et al.* Risk factors variation in 25-hydroxyvitamin D3 and D2  
33 383 concentrations and vitamin D deficiency in children. *J Clin Endocrinol Metab* 2012; 97: 1202-10.  
34  
35 384 35. Wortsman J, Matsuoka LY, Chen Tc, *et al.* Decreased bioavailability of vitamin D in obesity. *Am J Clin*  
36 385 *Nutr* 2000; 72: 690-3.  
37  
38 386 36. Haufroid V, Lison D. Urinary cotinine as a tobacco-smoke exposure index: a minireview. *Int Arch*  
39 387 *Occup Environ Health* 1998; 71: 162-8.  
40  
41 388 37. Paul G, Brehm JM, Alcorn JF, *et al.* Vitamin D and asthma. *Am J Respir Crit Care Med* 2012; 185:  
42 389 124-32.  
43  
44 390 38. Bozzetto S, Carraro S, Giordano G, *et al.* Asthma, allergy and respiratory infections: the vitamin D  
45 391 hypothesis. *Allergy* 2012; 67: 10-7.  
46  
47  
48  
49  
50  
51  
52  
53  
54  
55  
56  
57  
58  
59  
60

- 1  
2  
3  
4 392 39. Bath-hextall FJ, Jenkinson C, Humphreys R, *et al.* Dietary supplements for established atopic eczema.  
5  
6 393 *Cochrane Database Syst Rev* 2012; 15: CD005205  
7  
8 394 40. Hollams EM, Hart PH, Holt BJ, *et al.* Vitamin D and atopy and asthma phenotypes in children: a  
9  
10 395 longitudinal cohort study. *Eur respire J* 2011; 38: 1320-7.  
11  
12 396 41. Ito Y, Adachi Y, Yoshida K, *et al.* No association between serum vitamin D status and the prevalence of  
13  
14 397 allergic diseases in Japanese children. *Int Arch Allergy Immunol* 2013; 160: 218-20.  
15 398

For peer review only

1  
2  
3  
4  
5  
6  
7  
8  
9  
10  
11  
12  
13  
14  
15  
16  
17  
18  
19  
20  
21  
22  
23  
24  
25  
26  
27  
28  
29  
30  
31  
32  
33  
34  
35  
36  
37  
38  
39  
40  
41  
42  
43  
44  
45  
46  
47  
48  
49  
50  
51  
52  
53  
54  
55  
56  
57  
58  
59  
60

399 **FIGURE LEGENDS**

400 **Figure** Serum 25(OH)D levels: histogram

For peer review only

401 **Table 1. Characteristics of the study population. Univariate and multivariate analyses of factors associated with serum 25(OH)D**

|                                                              | Total (n=2515) | Vit D Level           |                                |                        | P value |
|--------------------------------------------------------------|----------------|-----------------------|--------------------------------|------------------------|---------|
|                                                              |                | Deficiency (<20ng/ml) | Insufficiency (≥20 - <30ng/ml) | Sufficiency (≥30ng/ml) |         |
| Age                                                          | 14.39 ± 0.07   | 14.66 ± 0.08          | 13.46 ± 0.15                   | 14.07 ± 0.52           | <.0001  |
| Sex                                                          |                |                       |                                |                        |         |
| Male                                                         | 1314 (53.39)   | 914 (51.20)           | 359 (59.74)                    | 41 (71.46)             | 0.0031  |
| Female                                                       | 1201 (46.61)   | 929 (37.45)           | 254 (40.26)                    | 18 (28.54)             |         |
| Region of residence                                          |                |                       |                                |                        |         |
| Urban                                                        | 1709 (71.98)   | 1297 (73.59)          | 379 (67.94)                    | 33 (50.84)             | 0.0108  |
| Rural                                                        | 806 (28.02)    | 546 (26.41)           | 234 (32.06)                    | 26 (49.16)             |         |
| Regular exercise                                             |                |                       |                                |                        |         |
| No                                                           | 1861 (73.83)   | 1375 (74.94)          | 449 (70.20)                    | 37 (69.98)             | 0.1912  |
| Yes                                                          | 654 (26.17)    | 468 (25.06)           | 164 (29.80)                    | 22 (30.02)             |         |
| Regular walking                                              |                |                       |                                |                        |         |
| No                                                           | 1354 (53.23)   | 981 (52.98)           | 339 (54.37)                    | 34 (50.44)             | 0.8708  |
| Yes                                                          | 1161 (46.77)   | 862 (47.02)           | 274 (45.63)                    | 25 (49.56)             |         |
| Income                                                       |                |                       |                                |                        |         |
| Lowest                                                       | 306 (13.87)    | 229 (14.33)           | 71 (12.78)                     | 6 (6.83)               | 0.0996  |
| Lower middle                                                 | 604 (27.04)    | 452 (27.66)           | 133 (24.41)                    | 19 (31.94)             |         |
| Higher middle                                                | 803 (30.39)    | 580 (30.92)           | 210 (29.54)                    | 13 (17.44)             |         |
| Highest                                                      | 802 (28.71)    | 582 (27.09)           | 199 (33.27)                    | 21 (43.79)             |         |
| Season                                                       |                |                       |                                |                        |         |
| April - October                                              | 1465 (58.38)   | 930 (51.36)           | 485 (81.49)                    | 50 (82.62)             | <.0001  |
| November - March                                             | 1050 (41.62)   | 913 (48.64)           | 128 (18.51)                    | 9 (17.38)              |         |
| BMI                                                          | 20.88 ± 0.10   | 21.12 ± 0.13          | 20.08 ± 0.19                   | 20.12 ± 0.47           | <.0001  |
| Smoking                                                      |                |                       |                                |                        |         |
| Active                                                       | 382 (18.22)    | 293 (19.08)           | 75 (13.99)                     | 14 (32.22)             | 0.0075  |
| Passive                                                      | 1200 (43.39)   | 913 (44.36)           | 261 (39.98)                    | 26 (42.56)             |         |
| No                                                           | 933 (38.40)    | 637 (36.56)           | 277 (46.03)                    | 19 (25.22)             |         |
| Atopic dermatitis                                            |                |                       |                                |                        |         |
| No                                                           | 2247 (89.44)   | 1648 (88.99)          | 546 (90.83)                    | 53 (92.28)             | 0.4675  |
| Yes                                                          | 268 (10.56)    | 195 (11.01)           | 67 (9.17)                      | 6 (7.72)               |         |
| Asthma                                                       |                |                       |                                |                        |         |
| No                                                           | 2412 (95.87)   | 1771 (95.85)          | 583 (95.68)                    | 58 (99.26)             | 0.5376  |
| Yes                                                          | 103 (4.13)     | 72 (4.15)             | 30 (4.32)                      | 1 (0.74)               |         |
| Data are presented as mean ± SE, n (weighted %).             |                |                       |                                |                        |         |
| Statistics were carried out using Rao-Scott Chi-square test. |                |                       |                                |                        |         |

403 **Table 2. Vitamin D levels in the study population**

|                                                                   | Vit D        | <i>P</i> value <sup>(1)</sup> | <i>P</i> value <sup>(2)</sup>     |
|-------------------------------------------------------------------|--------------|-------------------------------|-----------------------------------|
| Total                                                             | 16.68 ± 0.17 |                               |                                   |
| Sex                                                               |              |                               |                                   |
| Male                                                              | 17.26 ± 0.22 | <.0001                        |                                   |
| Female                                                            | 16.01 ± 0.21 |                               |                                   |
| Region of residence                                               |              |                               |                                   |
| Urban                                                             | 16.34 ± 0.20 | 0.0024                        |                                   |
| Rural                                                             | 17.53 ± 0.34 |                               |                                   |
| Regular exercise                                                  |              |                               |                                   |
| No                                                                | 16.52 ± 0.18 | 0.0565                        |                                   |
| Yes                                                               | 17.13 ± 0.31 |                               |                                   |
| Regular walking                                                   |              |                               |                                   |
| No                                                                | 16.62 ± 0.21 | 0.687                         |                                   |
| Yes                                                               | 16.74 ± 0.24 |                               |                                   |
| Income                                                            |              |                               |                                   |
| Lowest                                                            | 16.09 ± 0.41 | 0.0043                        | lowest vs highest : 0.0218        |
| Lower middle                                                      | 16.63 ± 0.29 |                               | lower middle vs highest : 0.1576  |
| Higher middle                                                     | 16.47 ± 0.24 |                               | higher middle vs highest : 0.0449 |
| Highest                                                           | 17.22 ± 0.31 |                               |                                   |
| Season                                                            |              |                               |                                   |
| April - October                                                   | 18.11 ± 0.21 | <.0001                        |                                   |
| November - March                                                  | 14.67 ± 0.21 |                               |                                   |
| Smoking                                                           |              |                               |                                   |
| Active                                                            | 16.52 ± 0.42 | 0.0062                        | active vs passive : 0.9439        |
| Passive                                                           | 16.37 ± 0.23 |                               | active vs no : 0.4260             |
| No                                                                | 17.10 ± 0.23 |                               | passive vs no : 0.0382            |
| Atopic dermatitis                                                 |              |                               |                                   |
| No                                                                | 16.68 ± 0.18 | 0.8887                        |                                   |
| Yes                                                               | 16.63 ± 0.32 |                               |                                   |
| Asthma                                                            |              |                               |                                   |
| No                                                                | 16.70 ± 0.18 | 0.4507                        |                                   |
| Yes                                                               | 16.22 ± 0.62 |                               |                                   |
| Data are presented as mean ± SE, n (weighted %).                  |              |                               |                                   |
| P value (1) : t-test or anova (variable : Income, Smoking) result |              |                               |                                   |
| P value (2) : multiple comparison : Tukey-Kramer                  |              |                               |                                   |

404

405

406 **Table 3. Multivariate linear regression analyses of serum 25(OH)D levels**

|                                                                    | Coefficient | 95% Confidence Interval | P value |
|--------------------------------------------------------------------|-------------|-------------------------|---------|
| Age                                                                | -0.52       | -0.65 , -0.40           | <.0001  |
| Sex                                                                |             |                         |         |
| Male                                                               | reference   |                         | <.0001  |
| Female                                                             | -1.40       | -1.88 , -0.91           |         |
| Region of residence                                                |             |                         |         |
| Urban                                                              | -0.85       | -1.55 , -0.14           | 0.0189  |
| Rural                                                              | reference   |                         |         |
| BMI                                                                | -0.10       | -0.17 , -0.03           | 0.0034  |
| Smoking                                                            |             |                         |         |
| Active                                                             | 0.47        | -0.42 , 1.36            | 0.3017  |
| Passive                                                            | -0.04       | -0.62 , 0.53            | 0.8842  |
| No                                                                 | reference   |                         |         |
| Season                                                             |             |                         |         |
| April - October                                                    | reference   |                         | <.0001  |
| November - March                                                   | -3.38       | -3.97 , -2.79           |         |
| Statistics were carried out using Multivariable linear regression. |             |                         |         |
| Model : adjusted for age, sex, region, BMI, smoking, season.       |             |                         |         |

408 **Table 4. Multivariate ordinal logistic regression analyses of categories of serum 25(OH)D levels**

|                                                                                     | Odds Ratio | 95% Confidence Interval | P value |
|-------------------------------------------------------------------------------------|------------|-------------------------|---------|
| Age                                                                                 | 1.22       | 1.13 , 1.31             | <.0001  |
| Sex                                                                                 |            |                         |         |
| Male                                                                                | reference  |                         | 0.0002  |
| Female                                                                              | 1.68       | 1.28 , 2.21             |         |
| Region of residence                                                                 |            |                         |         |
| Urban                                                                               | 1.32       | 0.96 , 1.81             | 0.0890  |
| Rural                                                                               | reference  |                         |         |
| BMI                                                                                 | 1.07       | 1.03 , 1.12             | 0.0011  |
| Smoking                                                                             |            |                         |         |
| Active                                                                              | 0.89       | 0.54 , 1.47             | 0.6539  |
| Passive                                                                             | 1.01       | 0.74 , 1.37             | 0.9535  |
| No                                                                                  | reference  |                         |         |
| Season                                                                              |            |                         |         |
| April - October                                                                     | reference  |                         |         |
| November - March                                                                    | 4.49       | 3.25 , 6.22             | <.0001  |
| Data are presented OR (95%CI).                                                      |            |                         |         |
| Statistics were carried out using Logistic regression.                              |            |                         |         |
| Serum 25(OH)D levels were categorized into 3 ordinal categories of vitamin D status |            |                         |         |
| (<20 : Deficiency , ≥20 - <30 : Insufficiency, 30≥ : Sufficiency)                   |            |                         |         |
| Model : adjusted for age, sex, region, BMI, smoking, season.                        |            |                         |         |

413 **Table 5. The estimated mean serum 25(OH)D levels and their differences according to AD and asthma**

|                                                                                                 | Unadjusted     |                             |                | Adjusted       |                             |                |
|-------------------------------------------------------------------------------------------------|----------------|-----------------------------|----------------|----------------|-----------------------------|----------------|
|                                                                                                 | Estimated mean | Difference (Estimated mean) | <i>P</i> value | Estimated mean | Difference (Estimated mean) | <i>P</i> value |
| Atopic dermatitis                                                                               |                |                             |                |                |                             |                |
| Yes                                                                                             | 16.68 ± 0.18   | 0.05 ± 0.34                 | 0.8887         | 16.87 ± 0.16   | 0.19 ± 0.33                 | 0.5776         |
| No                                                                                              | 16.63 ± 0.32   |                             |                | 16.68 ± 0.32   |                             |                |
| Asthma                                                                                          |                |                             |                |                |                             |                |
| Yes                                                                                             | 16.70 ± 0.18   | 0.48 ± 0.63                 | 0.4507         | 16.88 ± 0.15   | 0.72 ± 0.48                 | 0.1313         |
| No                                                                                              | 16.22 ± 0.62   |                             |                | 16.15 ± 0.47   |                             |                |
| Data are presented as numeric, mean ± SD.                                                       |                |                             |                |                |                             |                |
| Statistics were carried out using Simple linear regression and Multivariable linear regression. |                |                             |                |                |                             |                |
| Adjusted for age, sex, region, BMI, smoking, season.                                            |                |                             |                |                |                             |                |

416 **Table 6. ORs and 95% CIs of AD and asthma according to serum 25(OH)D levels**

|                                                        |               | Unadjusted          |                | Adjusted            |                |
|--------------------------------------------------------|---------------|---------------------|----------------|---------------------|----------------|
|                                                        |               | OR (95%CI)          | <i>P</i> value | OR (95%CI)          | <i>P</i> value |
| Atopic dermatitis                                      | Vit D Level   |                     |                |                     |                |
|                                                        | Sufficiency   | reference           |                | reference           |                |
|                                                        | Insufficiency | 1.21 (0.43 , 3.39)  | 0.7228         | 1.14 (0.41 , 3.19)  | 0.8078         |
|                                                        | Deficiency    | 1.48 (0.54 , 4.02)  | 0.4441         | 1.52 (0.54 , 4.22)  | 0.4271         |
| Asthma                                                 | Vit D Level   |                     |                |                     |                |
|                                                        | Sufficiency   | reference           |                | reference           |                |
|                                                        | Insufficiency | 6.02 (0.75 , 48.25) | 0.0908         | 4.87 (0.61 , 39.05) | 0.1360         |
|                                                        | Deficiency    | 5.79 (0.76 , 43.96) | 0.0898         | 5.31 (0.71 , 39.86) | 0.1042         |
| Data are presented OR (95%CI).                         |               |                     |                |                     |                |
| Statistics were carried out using Logistic regression. |               |                     |                |                     |                |
| Adjusted for age, sex, region, BMI, smoking, season.   |               |                     |                |                     |                |



1  
2  
3  
4  
5  
6  
7  
8  
9  
10  
11  
12  
13  
14  
15  
16  
17  
18  
19  
20  
21  
22  
23  
24  
25  
26  
27  
28  
29  
30  
31  
32  
33  
34  
35  
36  
37  
38  
39  
40  
41  
42  
43  
44  
45  
46  
47  
48  
49  
50  
51  
52  
53  
54  
55  
56  
57  
58  
59  
60

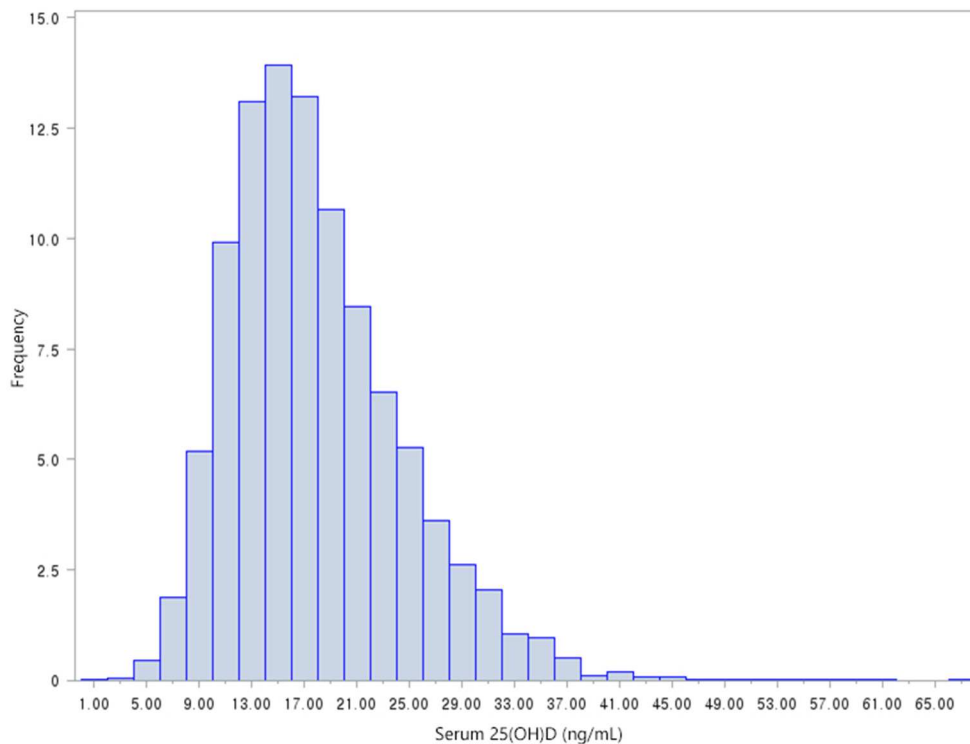

Figure Serum 25(OH)D levels: histogram

282x211mm (72 x 72 DPI)

ew only

# BMJ Open

## Suboptimal vitamin D status in Korean adolescents: A nation-wide study on its prevalence, risk factors including cotinine verified smoking status, and association with atopic dermatitis and asthma

|                                 |                                                                                                     |
|---------------------------------|-----------------------------------------------------------------------------------------------------|
| Journal:                        | <i>BMJ Open</i>                                                                                     |
| Manuscript ID                   | bmjopen-2017-016409.R1                                                                              |
| Article Type:                   | Research                                                                                            |
| Date Submitted by the Author:   | 23-May-2017                                                                                         |
| Complete List of Authors:       | Byun, Eun Jung<br>Heo, Jin Young<br>Cho, Sang Hyun<br>Lee, Jeong Deuk<br>Kim, Hei Sung; Dermatology |
| <b>Primary Subject Heading</b>: | Epidemiology                                                                                        |
| Secondary Subject Heading:      | Dermatology, Smoking and tobacco, Health services research, Paediatrics                             |
| Keywords:                       | vitamin D deficiency, atopic dermatitis, cotinine, smoking, adolescent                              |
|                                 |                                                                                                     |

SCHOLARONE™  
Manuscripts

1  
2  
3  
4 **1 Research**

5  
6 **2 Suboptimal vitamin D status in Korean adolescents: A nation-wide**  
7 **3 study on its prevalence, risk factors including cotinine verified**  
8 **4 smoking status, and association with atopic dermatitis and asthma**  
9  
10  
11  
12  
13

14 Eun Jung Byun,<sup>1</sup> Jinyoung Heo,<sup>2</sup> Sang Hyun Cho,<sup>1</sup> Jeong Deuk Lee,<sup>1</sup> and Hei Sung Kim<sup>1\*</sup>

15  
16 <sup>1</sup>Department of Dermatology, Incheon St. Mary's Hospital, College of Medicine, The Catholic University of  
17  
18 Korea, Incheon, Korea

19 <sup>2</sup>Department of Preventive Medicine, The Catholic University of Korea, Seoul, Korea  
20  
21  
22  
23  
24

25 **11 Short title: Suboptimal vitamin D status in Korean adolescents**  
26  
27  
28  
29  
30  
31  
32  
33  
34

35 **16 \*Corresponding Author**

36  
37 Hei Sung Kim, MD, PhD

38  
39 Department of Dermatology, Incheon St. Mary's Hospital, The Catholic University of Korea, 56

40  
41 Dongsuro, Bupyeong-gu, 150-713, Incheon, Korea

42  
43 Tel: +82-32-280-5105

44  
45 Fax: +82-32-506-9514

46  
47 E-mail: [hazelkimhoho@gmail.com](mailto:hazelkimhoho@gmail.com)  
48  
49  
50  
51  
52  
53  
54  
55  
56  
57  
58  
59  
60

1  
2  
3  
4  
5  
6  
7  
8  
9  
10  
11  
12  
13  
14  
15  
16  
17  
18  
19  
20  
21  
22  
23  
24  
25  
26  
27  
28  
29  
30  
31  
32  
33  
34  
35  
36  
37  
38  
39  
40  
41  
42  
43  
44  
45  
46  
47  
48  
49  
50  
51  
52  
53  
54  
55  
56  
57  
58  
60

## 23 ABSTRACT

24 **Objective:** To determine the prevalence and risk factors for suboptimal vitamin D status in Korean  
25 adolescents, and to assess its relationship with atopic dermatitis (AD) and asthma at a national level.

26 **Design:** This is a cross-sectional study with data from the Korean National Health and Nutrition  
27 Examination Survey. Information regarding socioeconomic characteristics, clinical data and  
28 environmental factors was collected. Blood and urine samples were taken for vitamin D and cotinine  
29 respectively. Descriptive and multivariable logistic regression was performed on the data.

30 **Setting:** South Korea (Nation-wide)

31 **Participants:** 2,515 individuals aged 10-18 years who participated in the Korean National Health and  
32 Nutrition Examination Survey from 2008-2011.

33 **Main outcome measures:** Vitamin D status was determined through measurement of serum 25-  
34 hydroxyvitamin D (25OHD). Smoking status was classified based on the urine cotinine level.  
35 Physician diagnosed AD and asthma were assessed using a questionnaire.

36 **Results:** Overall, 73.3% of the subjects were vitamin D deficient (25OHD < 20 ng/mL) and 24.4% of  
37 the subjects were vitamin D insufficient (25OHD, 20-29.9 ng/mL). Older age ( $p<0.001$ ), female  
38 gender ( $p<0.001$ ), urban residence ( $p=0.019$ ), higher body mass index ( $p=0.003$ ) and sampling in  
39 winter months (November-March) ( $p<0.001$ ) were independently associated with low serum 25OHD  
40 levels. With cotinine verification, 18.2% of the participants were classified as active smokers, and  
41 43.4% were classified as passive smokers. After adjusting for potential cofounders, serum 25OHD  
42 status showed no association with AD or asthma.

43 **Conclusion:** Vitamin D deficiency is highly prevalent in Korean adolescents. Cotinine-verified  
44 prevalence of smoking was also high, but its relationship with vitamin D deficiency was not  
45 confirmed in our study. Above all, our results provide epidemiologic evidence against the association  
46 of vitamin D status with AD and asthma at the national level among Korean adolescents.

### 47 **Strengths and limitations of this study**

48 The Strength of this study is that a nationally representative sample was used as the study population.

49 This study is unique in that a cotinine-verified smoking status was adopted. Cotinine (a metabolite of

1  
2  
3  
4 50 nicotine) is a specific marker of smoking with high sensitivity.

5  
6 51 The limitation of the study is its cross-sectional design and the lack of data on the population's dietary  
7  
8 52 and supplemental vitamin D intake. Also, the study has recall bias because the diagnoses of allergic  
9  
10 53 conditions (AD and asthma) were self-reported.

11  
12 54 The definition of asthma and AD were physician-diagnosed asthma and AD which may have missed  
13  
14 55 some children with symptomatic asthma and AD who have not been diagnosed.

15  
16 56

17  
18 57  
19  
20  
21  
22  
23  
24  
25  
26  
27  
28  
29  
30  
31  
32  
33  
34  
35  
36  
37  
38  
39  
40  
41  
42  
43  
44  
45  
46  
47  
48  
49  
50  
51  
52  
53  
54  
55  
56  
57  
58  
59  
60

## 58 INTRODUCTION

59 Vitamin D is essential for skeletal health and bone growth and its deficiency has been associated with  
60 skeletal deformities in children and fracture risk in adults. Recent studies have also identified the  
61 previously unanticipated roles of vitamin D in the immune system, cardiovascular system and cancer  
62 prevention.<sup>1,2</sup> Despite growing health concerns over low vitamin D status, few nation-wide studies  
63 have been performed to evaluate vitamin D deficiency in the Korean pediatric population.<sup>3,4</sup>  
64 Suboptimal vitamin D level was reported in 70% of the US children (9% vitamin D deficient, 61%  
65 vitamin D insufficient),<sup>5</sup> and it was found in 41.7% of the children from New Zealand).<sup>6</sup> Korean  
66 adolescents are theoretically at increased risk for vitamin D deficiency because of the high latitude  
67 (34-38°N), culturally vigorous sun protection, reduced outdoor activity and lack of vitamin D-fortified  
68 food.

69 The increasing prevalence of allergic diseases is a world-wide phenomenon and it is strikingly more  
70 evident in the younger population compared to adults.<sup>7</sup> Vitamin D has immunomodulatory functions,  
71 and its relationship with allergic disease has been evaluated in a number of studies.<sup>8-15</sup> While some  
72 authors have reported about the protective role of vitamin D in atopic dermatitis (AD), asthma,  
73 allergic rhinitis (AR) and allergic sensitization in childhood, other authors have shown a deleterious  
74 effect. Although the exact cause of such conflicting results is not known, racial difference may be a  
75 contributing factor. Unfortunately, nation-wide studies on vitamin D and allergic disease are limited  
76 and are mostly from western countries.

77 In this study, we aimed to identify the prevalence and risk factors for vitamin D deficiency in Korean  
78 adolescents and to assess its relationship with AD and asthma at the national level. Cotinine-verified  
79 smoking status was adopted in this study.

**METHODS****Study population**

This study was based on data acquired from the Korean National Health and Nutrition Examination Survey (KNHANES), a survey conducted by the Korea Centers for Disease Control and Prevention to provide nationally representative and reliable statistical data regarding the health, behavior associated with health, nutrition, and food intake status of the Korean population. Data were collected from 2008 to 2011, which corresponds to the second and third year of KNHANES IV (2007-2009) and the first and second year of KNHANES V (2010-2012). The survey included a health interview, a nutritional survey, physical examination, and blood and urine tests. The institutional review board at the Korea Centers for Disease Control and Prevention/ Incheon St. Mary's Hospital, The Catholic University of Korea (IRB number: OC17ZESI0055) approved the protocol, and all participants and their parents signed informed consent forms.

Both KNHANES IV and V adopted the stratified multistage cluster sampling design by using the rolling-survey sampling method. The rolling sample collected each year is the probability sample representing the general Korean population, and it is homogeneous and independent of each other. In 2008, 2009, 2010 and 2011, a total of 37,753 individuals were sampled. The study population was further limited to 4,598 adolescents aged 10-18 years. Among the 4,598 participants, we subsequently excluded the following participants: those whose serum 25-hydroxyvitamin D (25OHD) levels were not measured; those without urine cotinine levels; those who did not completely answer the questions regarding AD or asthma; those without body mass index (BMI) measurement; and those who had a chronic disease that may affect vitamin D metabolism. Finally, a total of 2,515 participants (1,314 males and 1,201 females) were eligible for analysis.

**Study variables**

Blood samples were collected from the antecubital vein, refrigerated immediately, transported to the central testing facility in cold storage, and analyzed within 24 hours of sampling. Serum 25OHD levels were measured as described previously<sup>16</sup> and categorized as sufficient ( $\geq 30$  ng/mL), insufficient (20-29.9 ng/mL) or deficient ( $< 20$  ng/mL).<sup>17</sup>

1  
2  
3  
4 107 Factors were categorized to analyze the risk factors for vitamin D deficiency. Age and BMI were  
5  
6 108 continuous variables while season of sampling was categorized into winter months (November-  
7  
8 109 March) and summer months (April-October).<sup>18</sup> The region of residence of each participant was  
9  
10 110 grouped as follows: urban (Seoul, Gyeonggi, Busan, Daegu, Incheon, Gwangju, Daejeon, and Ulsan)  
11  
12 111 and rural (Gangwon, Chungbuk, Chungnam, Jeonbuk, Jeonnam, Gyeongbuk, Gyeongnam, and  
13  
14 112 Jeju).<sup>19</sup> Monthly income was standardized according to the number of family members (monthly  
15  
16 113 income/number of family members) and it was divided into the following 4 quartile groups: lowest,  
17  
18 114 lower middle, higher middle, and highest. Participants who performed moderate physical activity for  
19  
20 115 more than 30 minutes per day on more than 5 days a week and/or strenuous physical activity for more  
21  
22 116 than 20 minutes per day on more than 3 days a week were assigned to the regular exercise group.  
23  
24 117 Regular walking was designated as “yes” for those who walked for more than 30 minutes per day on  
25  
26 118 more than 5 days a week.<sup>19</sup> Smoking status was divided into three groups based on the urine cotinine  
27  
28 119 level, which are as follows: non-smokers (<5 ng/mL), passive smokers (secondhand smoking) (5-100  
29  
30 120 ng/mL) and active smokers (>100 ng/mL).<sup>19-21</sup> Urine cotinine level was measured by chromatography  
31  
32 121 mass spectrometry using the Perkin Elmer Clarus 600T (PerkinElmer, Turku, Finland). All data were  
33  
34 122 measured in a standardized manner and reviewed by the central quality control center.  
35  
36 123 The following question was used to assess physician-diagnosed AD in each participant: “Have you  
37  
38 124 been diagnosed with AD by a doctor?” or “Have you been told by a doctor that (your child) had AD?”  
39  
40 125 Physician-diagnosed asthma was also determined using similar questions.  
41  
42

#### 43 **Statistical analysis**

44  
45 127 Statistical analyses were performed using an SAS survey procedure (version 9.2; SAS Institute, Inc.,  
46  
47 128 Cary, NC, USA), and 2-sided *p* values of less than 0.05 were considered statistically significant. To  
48  
49 129 produce unbiased national estimates representing the general Korean population, we used KNHANES  
50  
51 130 sample weights accounting for the complex sampling design to each participant.  
52  
53 131 To compare the mean serum 25OHD levels among categories of each possible predicting factor,  
54  
55 132 Student’s *t*-test or ANOVA (followed by Tukey-Kramer for multiple comparison) was used.  
56  
57 133 Univariate analysis was performed to evaluate the association of the possible predicting factors, AD  
58  
59  
60



1  
2  
3  
4 134 and asthma with vitamin D deficiency. Participants' characteristics were described using means and  
5  
6 135 standard errors for continuous variables and numbers and percentages for categorical variables. Here,  
7  
8 136 the Student's *t*-test or ANOVA was used for comparing continuous variables, as appropriate, and Rao-  
9  
10 137 Scott  $\chi^2$  test was used for comparing categorical variables. Variables with a *p*-value <0.05 in  
11  
12 138 univariate analyses were included in the multivariate regression model for exploring factors  
13  
14 139 associated with serum 25OHD.

15  
16 140 To estimate the mean serum 25OHD levels in participants with and without AD and asthma, we  
17  
18 141 performed simple and multiple linear regression analyses using the generalized linear model for a  
19  
20 142 complex survey design. The estimated means were calculated as follows: no adjustment for potential  
21  
22 143 confounders; and confounder adjustment for age, gender, region, BMI, smoking, and season of  
23  
24 144 sampling.

25  
26 145 To estimate the odds ratios (ORs) for AD and asthma according to quartiles of serum 25OHD levels,  
27  
28 146 we conducted simple and multivariate logistic regression analyses by using the generalized linear  
29  
30 147 model for a complex survey design. The ORs and 95% CIs were calculated in the following ways: no  
31  
32 148 adjustment for potential confounders; and confounder adjustment for age, gender, region, BMI,  
33  
34 149 smoking, and season of sampling.  
35  
36  
37  
38  
39  
40  
41  
42  
43  
44  
45  
46  
47  
48  
49  
50  
51  
52  
53  
54  
55  
56  
57  
58  
59  
60

## 150 RESULTS

### 151 General characteristics

152 A total of 2,515 subjects (1,314 males and 1,201 females, age:  $14.4 \pm 0.1$  years) were included in the  
153 study. Table 1 summarizes the baseline data of the participants. The mean BMI of the study  
154 population was  $20.9 \text{ kg/m}^2$  (SE: 0.1). Blood samples were drawn more frequently in April-October  
155 (58.4%) than in November-March (41.6%). The urine cotinine-verified smoking statuses were as  
156 follows: active smoking 18.2%, passive smoking 43.4%, and non-smoking 38.4%. The prevalence of  
157 AD and asthma in the study population were 10.6% and 4.1%, respectively.

### 158 Serum 25OHD levels in the study population

159 The mean concentration of serum 25OHD in the 2,515 subjects was  $16.7 \text{ ng/mL}$  (SE: 0.2), with a  
160 range of 3.0 to  $46.2 \text{ ng/mL}$ . Overall, 1,843 subjects (73.3%) were vitamin D deficient, 613 subjects  
161 (24.4%) were vitamin D insufficient, and 59 subjects (2.3%) were vitamin sufficient (Figure). Girls  
162 had a significantly lower mean serum 25OHD level than boys ( $16.0 \pm 0.2 \text{ ng/mL}$  vs  $17.3 \pm 0.2 \text{ ng/mL}$ ,  
163  $p < 0.001$ ), and subjects sampled in winter months (November-March) had lower serum 25OHD levels  
164 than those sampled in summer months (April-October) ( $14.7 \pm 0.2 \text{ ng/mL}$  vs  $18.1 \pm 0.2 \text{ ng/mL}$ ,  
165  $p < 0.001$ ). Passive smoking (vs non-smoking) and urban residence (vs rural) were also associated with  
166 statistically lower serum 25OHD levels ( $p = 0.038$  and  $p = 0.002$ , respectively) (Table 2).

### 167 Univariate and multivariate analyses of factors associated with serum 25OHD

168 Univariate analysis revealed that age ( $p < 0.001$ ), gender ( $p = 0.003$ ), region of residence ( $p = 0.011$ ),  
169 season of sampling ( $p < 0.001$ ), BMI ( $< 0.001$ ) and smoking status ( $p = 0.008$ ) were associated with  
170 vitamin D deficiency (Table 1).

171 Multivariate linear regression analysis of serum 25OHD levels was performed using variables that had  
172 a  $p$ -value  $< 0.05$  in univariate analyses. Older age ( $p < 0.001$ ), female gender ( $p < 0.001$ ), urban  
173 residence ( $p = 0.019$ ), higher BMI ( $p = 0.003$ ) and sampling in winter months (November-March)  
174 ( $p < 0.001$ ) were independently associated with low serum 25OHD levels (Table 3). Multivariate  
175 ordinal logistic regression analysis of serum 25OHD showed similar results (Table 4).

### 176 Relationship of serum 25OHD with AD and asthma

1  
2  
3  
4 177 Univariate analysis demonstrated that vitamin D deficiency was not significantly associated with AD  
5  
6 178 ( $p=0.468$ ) or asthma ( $p=0.538$ ) (Table 1).  
7

8 179 Multivariate logistic regression showed that vitamin D deficiency had no association with AD and  
9  
10 180 asthma after adjusting for age, gender, region of residence, BMI, smoking, and season of sampling.

11  
12 181 The adjusted odds ratio for AD and asthma increased across categories of serum 25OHD (1.00  
13  
14 182 [reference] for  $\geq 30$  ng/mL, 1.14 and 4.87 each for 20-29.9 ng/mL, and 1.52 and 5.31, respectively for  
15  
16 183  $<20$  ng/mL), but it was not statistically significant ( $p=0.8078$  (AD) and  $p=0.1360$  (asthma) for 20-29.9  
17  
18 184 ng/mL and  $p=0.4271$  (AD) and  $p=0.1042$  (asthma) for  $<20$  ng/mL) (Table 5).  
19

20 185 Univariate or multivariate analyses with serum 25OHD levels as a continuous variable showed similar  
21  
22 186 results, regardless of the adjustment (Table 6).  
23  
24  
25  
26  
27  
28  
29  
30  
31  
32  
33  
34  
35  
36  
37  
38  
39  
40  
41  
42  
43  
44  
45  
46  
47  
48  
49  
50  
51  
52  
53  
54  
55  
56  
57  
58  
59  
60

**DISCUSSION**

In our cross-sectional study of Korean adolescents, Vitamin D deficiency was very common, where the mean concentration of serum 25OHD was 16.7 ng/mL with 73.3% of the subjects being vitamin D deficient (serum 25OHD < 20 ng/mL). Potential explanations for this remarkably low vitamin D status observed in Korean children include, but are not limited to pigmented skin (skin pigmentation is known to reduce the skin's production of vitamin D in East Asian populations),<sup>3</sup> vigorous use of sunscreens and possibly dietary factors. The Dietary Reference Intakes for vitamin D from the Institute of Medicine (2010) and the American Academy of Pediatrics state that the Adequate Intake (AI) of vitamin D is 15 µg/day for children.<sup>22,23</sup> However, in the Dietary Reference Intakes for vitamin D for Koreans published in 2010, the AI of vitamin D for children is claimed to be 5 µg/day,<sup>24</sup> which we feel is too low. Exposure to sunlight, specifically UVB, leads to vitamin D synthesis in the skin, which provides most of the vitamin D requirement of an individual. In Korea (latitude: 34-38°N), vitamin D is synthesized mostly between April and October (summer months),<sup>25</sup> which was apparent in our study.

The finding of an inverse relationship of age, female gender, urban residence, and BMI with vitamin D status is in accordance with previous studies.<sup>3,4,26-28</sup> It has been previously shown that there is a consistent decline in physical outdoor activity over the school age years. The prevalence of physical inactivity is higher in girls than in boys and it is greater in obese children than in their normal-weight peers. The lifestyle in big cities is also sedentary, and it is therefore possible that age, gender, place of residence and BMI may act as surrogate indicators for sunlight exposure through their association with physical activity. In addition to limited sunlight exposure from physical inactivity, the inverse association of BMI and urban residence with vitamin D levels can be explained by sequestration of vitamin D in fat tissues<sup>29</sup> and UVB blockade due to air pollution.

This nation-wide study is particularly meaningful as it is the first to measure both serum 25(OH)D and urine cotinine in a population of 2,515 Korean adolescents. Smoking has been quoted as a significant determinant of serum 25OHD in a number of studies,<sup>20,21,28,30</sup> including one from Taiwan,<sup>28</sup> where passive smoking was independently associated with low serum 25OHD. To identify the effect

1  
2  
3  
4 214 of smoking on serum 25OHD in Koreans, we adopted urine cotinine, which is presently the biomarker  
5  
6 215 of choice for assessing tobacco smoke exposure.<sup>31-34</sup> KNHANES normally assesses a person's  
7  
8 216 smoking status via a survey. For those who are aged 19 years and above, detailed questions are asked  
9  
10 217 regarding the presence and history of active and passive smoking, but for those who are aged less than  
11  
12 218 19 years, the questions are much more limited. There is currently no data with regards to passive  
13  
14 219 smoking in Korean adolescents and the survey only determines the presence of active smoking in  
15  
16 220 subjects aged between 12-18 years. Omissions and false responses are common in this age group<sup>35</sup>  
17  
18 221 which impede accurate assessment of the smoking status, and to improve accuracy, we adopted the  
19  
20 222 cotinine-verified smoking status in our study. Urine cotinine level was measured for a limited time-  
21  
22 223 period (2008-2011), and this measurement has only been performed for those aged 10 years and above,  
23  
24 224 which resulted in an inevitable reduction of our study population. We used a urine cotinine cut off  
25  
26 225 value of more than 100 ng/mL to discriminate smokers from non-smokers and 5 ng/mL as a threshold  
27  
28 226 for non-smokers exposed to secondhand smoking based on published values.<sup>31-33</sup> With cotinine  
29  
30 227 verification, 18.2% of the participants were classified as active smokers, 43.4% of the participants  
31  
32 228 were classified as passive smokers, and 38.4% of the participants were classified as non-smokers,  
33  
34 229 where the percentage of smokers (active and passive) was higher than what we expected.  
35  
36 230 Smokers have been reported to have a significantly higher risk of vitamin D deficiency,<sup>20,21,28,30</sup> but  
37  
38 231 this was not confirmed in our study. Since active smoking is usually done outdoors, this can result in  
39  
40 232 greater exposure to sunlight which may alter the true effect of smoking on serum 25OHD. Passive  
41  
42 233 smoking in adolescents is more likely to occur indoors and interestingly-enough, passive smoking was  
43  
44 234 reported to be independently associated with low serum 25OHD in Taiwanese children/adolescents.<sup>28</sup>  
45  
46 235 However, results can also be influenced by cotinine cut-off values and higher thresholds such as 10  
47  
48 236 ng/mL or 30 ng/mL may be considered in the future when testing children as this population can have  
49  
50 237 higher cotinine concentrations than adults due to differences in body distribution and nicotine  
51  
52 238 metabolism.<sup>36</sup>  
53  
54 239 Some studies have indicated that an adequate concentration of vitamin D is protective against allergic  
55  
56 240 disease in children.<sup>8,9,15,37,38</sup> However, most of these findings have been reported in western countries  
57  
58  
59  
60

1  
2  
3  
4 241 and only a few studies have been performed in Asia. We consider our investigation meaningful  
5  
6 242 because differences among ethnicities and subjects of various age groups can possibly affect the  
7  
8 243 results.

9  
10 244 In this national level study, the risk of AD and asthma were not dependent on serum 25OHD. The  
11  
12 245 present study results, as well as prior studies which showed little association between vitamin D  
13  
14 246 deficiency and AD,<sup>10-12,28</sup> raise questions on the suggestion that vitamin D may be used to prevent or  
15  
16 247 treat AD. In fact, a Cochrane review found no evidence for an effect of vitamin D supplementation on  
17  
18 248 AD.<sup>39</sup> The beneficial effect of sunlight on AD has been well documented, but this is probably due to  
19  
20 249 the anti-inflammatory and antimicrobial effects of UV and not those of vitamin D.

21  
22 250 As in AD, there has been considerable controversy over the relationship between vitamin D levels and  
23  
24 251 asthma in children. While some studies showed an inverse relationship between vitamin D levels and  
25  
26 252 current wheeze and asthma severity,<sup>8</sup> others such as Hollams et al.<sup>40</sup> showed no significant cross-  
27  
28 253 sectional association between serum vitamin D levels and current asthma. Our study too did not find  
29  
30 254 any relationship between vitamin D level and asthma, but further studies would be needed to  
31  
32 255 determine a causal relationship and its mechanism.

33  
34 256 This study has several notable strengths. The sampling of adolescents across a broad age range, a  
35  
36 257 large sample size with robust data collection, incorporation of objective markers of smoking status,  
37  
38 258 and a thorough analysis strengthen the results of this study. Limitations of the study include its cross-  
39  
40 259 sectional design and lack of data on dietary and supplemental vitamin D intake. Also, the study is  
41  
42 260 prone to recall bias because diagnoses of allergic conditions (AD and asthma) were self-reported. The  
43  
44 261 definition of asthma and AD were physician-diagnosed asthma and AD, which may have missed some  
45  
46 262 children with symptomatic asthma and AD in the population who have not been diagnosed. Although  
47  
48 263 season adjusted, desasonalization of vitamin D levels with an algorithm<sup>41</sup> may have further increased  
49  
50 264 the accuracy and strength of our study.

51  
52 265 In conclusion, a high prevalence of vitamin D deficiency was noted in Korean adolescents aged 10 to  
53  
54 266 18 years. For high risk individuals of vitamin D deficiency, we suggest vitamin D supplementation  
55  
56 267 and food fortification. Adequate outdoor activity should also be emphasized in Korean adolescents,  
57  
58  
59  
60

1  
2  
3  
4 268 especially high school students, via media promotion and public health plans by schools and  
5  
6 269 government. We found no apparent association between the cotinine-verified smoking status, AD, and  
7  
8 270 asthma with vitamin D deficiency, which merits further study.  
9  
10 271  
11  
12  
13  
14  
15  
16  
17  
18  
19  
20  
21  
22  
23  
24  
25  
26  
27  
28  
29  
30  
31  
32  
33  
34  
35  
36  
37  
38  
39  
40  
41  
42  
43  
44  
45  
46  
47  
48  
49  
50  
51  
52  
53  
54  
55  
56  
57  
58  
59  
60

For peer review only

1  
2  
3  
4 272 **Acknowledgements** This study was supported by a grant of the Korean Healthcare technology R&D  
5  
6 273 project, Ministry of Health & Welfare, Republic of Korea (Grant No.: HN15C0105). The funders had  
7  
8 274 no role in study design, collection, analysis and interpretation of data, writing of the manuscript, or  
9  
10 275 decision to submit for publication.  
11

12 276

13  
14 277 **Contributors** EJB, SHC, JDL, and HSK made substantial contributions to the conception or design of  
15  
16 278 the work. JYH and HSK had role in the acquisition, analysis and interpretation of data for the work.  
17  
18 279 EJB, SHC, JDL, and HSK drafted and revised the work and all authors gave final approval and agreed  
19  
20 280 to be accountable for all aspects of the work.  
21

22 281

23  
24 282 **Funding** This study was supported by a grant of the Korean Healthcare technology R&D project,  
25  
26 283 Ministry of Health & Welfare, Republic of Korea (Grant No.: HN15C0105)  
27

28 284

29  
30 285 **Competing interests** None declared.  
31

32 286

33  
34 287 **Ethics approval** The institutional review board at the Korea Centers for Disease Control and  
35  
36 288 Prevention/ Incheon St. Mary's Hospital, The Catholic University of Korea (IRB number:  
37  
38 289 OC17ZESI0055) approved the protocol.  
39

40 290

41  
42 291 **Data sharing statement** All data from the study, published and unpublished, are available to the  
43  
44 292 principle investigators. The data are managed under the Department of Dermatology, Incheon St.  
45  
46 293 Mary's Hospital, The Catholic University of Korea, Incheon, Korea.  
47

48 294  
49  
50  
51  
52  
53  
54  
55  
56  
57  
58  
59  
60



295 **REFERENCES**

- 296 1. Holick MF. Vitamin D deficiency. *N Engl J Med* 2007; 257: 266-81.
- 297 2. Cheng HM, Kim S, Park GH, *et al.* Low vitamin D levels are associated with atopic dermatitis, but not  
298 allergic rhinitis, asthma, or IgE sensitization, in the adult Korean population. *J Allergy Clin Immunol*  
299 2014; 133: 1048-55.
- 300 3. Kim SH, Oh MK, Namgung R, *et al.* Prevalence of 25-hydroxyvitamin D deficiency in Korean  
301 adolescents: association with age, season, and parental vitamin D status. *Public Health Nutr* 2014; 17:  
302 122-30.
- 303 4. Lee YA, Kim HY, Hong H, *et al.* Risk factors for low vitamin D status in Korean adolescents: the  
304 Korea National Health and Nutrition Examination Survey (KNHANES) 2008-2009. *Public Health*  
305 *Nutr* 2014; 17: 764-71.
- 306 5. Kumar J, Muntner P, Kaskel FJ, *et al.* Prevalence and associations of 25-hydroxyvitamin D deficiency  
307 in US children: NHANES 2001-2004. *Pediatrics* 2009; 124: e362-70.
- 308 6. Rockell JE, Green TJ, Skeaff CM, *et al.* Season and ethnicity are determinants of serum 25-  
309 hydroxyvitamin D concentrations in New Zealand children aged 5-14 y. *J Nutr* 2005; 135: 2602-8.
- 310 7. Asher MI, Montefort S, Bjorksten B, *et al.* Worldwide time trends in the prevalence of symptoms of  
311 asthma, allergic rhino-conjunctivitis, and eczema in childhood: ISAAC Phases One and Three repeat  
312 multi-country cross-sectional surveys. *Lancet* 2006; 26: 733-43.
- 313 8. Bener A, Ehlayel MS, Tulic MK, *et al.* Vitamin D deficiency as a strong predictor of asthma in  
314 children. *Int Arch Allergy Immunol* 2012; 157: 168-75.
- 315 9. El Taieb MA, Fayed HM, Aly SS, *et al.* Assessment of serum 25-hydroxyvitamin D levels in children  
316 with atopic dermatitis: correlation with SCORAD index. *Dermatitis* 2013; 24: 296-301.
- 317 10. Berents TL, Lodrup Carlsen KC, *et al.* Vitamin D levels and atopic eczema in infancy and early  
318 childhood in Norway: a cohort study. *Br J Dermatol* 2016; 175: 95-101.
- 319 11. Barman M, Jonsson K, Hesselmar B, *et al.* No association between allergy and current 25-  
320 hydroxyvitamin D in serum or vitamin D intake. *Acta Paediatr* 2015; 104: 405-13.
- 321 12. Chiu YE, Havens PL, Siegel DH, *et al.* Serum 25-hydroxyvitamin D concentration does not correlate  
322 with atopic dermatitis severity. *J Am Acad Dermatol* 2013; 69: 40-6.
- 323 13. Yang HK, Choi J, Kim WK, *et al.* The association between hypovitaminosis D and pediatric allergic  
324 disease: A Korean nationwide population-based study. *Allergy Asthma Proc* 2016; 37: 64-9.

- 1  
2  
3  
4 325 14. Lee SJ, Kang BH, Choi BS. Vitamin D serum levels in children with allergic and vasomotor rhinitis.  
5  
6 326 *Korean J Pediatr* 2015; 58: 325-9.  
7  
8 327 15. Cheon BR, Shin JE, Kim YJ, *et al.* Relationship between serum 25-hydroxyvitamin D and interleukin-  
9  
10 328 31 levels, and the severity of atopic dermatitis in children. *Korean J Pediatr* 2015; 58: 96-101.  
11  
12 329 16. Nam GE, Kim DH, Cho KH, *et al.* 25-Hydroxyvitamin D insufficiency is associated with  
13  
14 330 cardiometabolic risk in Korean adolescents: the 2008-2009 Korea National Health and Nutrition  
15  
16 331 Examination Survey (KNHANES). *Public Health Nutr* 2014; 17: 186-94.  
17  
18 332 17. Holick MF, Binkley NC, Bischoff-Ferrari HA, *et al.* Evaluation, treatment, and prevention of vitamin  
19  
20 333 D deficiency: An Endocrine Society clinical practice guideline. *J Clin Endocrinol Metab* 2011; 96:  
21  
22 334 1911-30.  
23  
24 335 18. McKinney K, Breitkopf CR, Berenson AB. Association of race, body fat and season with vitamin D  
25  
26 336 status among young women: a cross-sectional study. *Clin Endocrinol (Oxf)* 2008; 69: 535-41.  
27  
28 337 19. Choi HS, Oh HJ, Choi H, *et al.* Vitamin D insufficiency in Korea- a greater threat to younger  
29  
30 338 generation: The Korea National Health and Nutrition Examination Survey (KNHANES) 2008. *J Clin*  
31  
32 339 *Endocrinol Metab* 2011; 96: 643-51.  
33  
34 340 20. Kassi EN, Stavropoulos S, Kokkoris P, *et al.* Smoking is a significant determinant of low serum  
35  
36 341 vitamin D in young and middle-aged healthy males. *Hormones (Athens)* 2015; 14: 245-50.  
37  
38 342 21. Manavi KR, Alston-Mills BP, Thompson MP, *et al.* Effect of serum cotinine on vitamin D serum  
39  
40 343 concentrations among American females with different ethnic backgrounds. *Anticancer Res* 2015; 35:  
41  
42 344 1211-8.  
43  
44 345 22. Wagner CL, Greer FR. Prevention of rickets and vitamin D deficiency in infants, children, and  
45  
46 346 adolescents. *Pediatrics* 2008; 122: 1142-52.  
47  
48 347 23. Ross AC, Manson JE, Abrams SA, *et al.* The 2011 report on dietary reference intakes for calcium and  
49  
50 348 vitamin D from the institute of medicine: what clinicians needs to know. *J Clin Endocrinol Metab*  
51  
52 349 2011; 96: 53-8.  
53  
54 350 24. Ryou E. Adolescent nutrition: what do pediatricians do? *Korean J Pediatr* 2011; 54: 287-91.  
55  
56 351 25. Chung IH, Kim HJ, Chung S, *et al.* Vitamin D deficiency in Korean children: prevalence, risk factors,  
57  
58 352 and the relationship with parathyroid hormone levels. *Ann Pediatr Endocrinol Metab* 2014; 19: 86-90.  
59  
60 353 26. Carpenter TO, Herreros F, Zhang JH, *et al.* Demographic, dietary, and biochemical determinants of  
354  
vitamin D status in inner-city children. *Am J Clin Nutr* 2012; 95: 137-46.

- 1  
2  
3  
4 355 27. Tolppanen AM, Fraser A, Fraser WD, Lawlor DA. Risk factors variation in 25-hydroxyvitamin D3 and  
5 356 D2 concentrations and vitamin D deficiency in children. *J Clin Endocrinol Metab* 2012; 97: 1202-10.  
6  
7 357 28. Yao TC, Tu YL, Chang SW, *et al.* Suboptimal vitamin D status in a population-based study of Asian  
8 358 children: prevalence and relation to allergic disease and atopy. *PLoS One* 2014; 9: e99105  
9  
10 359 29. Wortsman J, Matsuoka LY, Chen Tc, *et al.* Decreased bioavailability of vitamin D in obesity. *Am J Clin*  
11 360 *Nutr* 2000; 72: 690-3.  
12  
13 361 30. Cutillas-Marco E, Fuertes-Prosper A, Grant WB, *et al.* Vitamin D deficiency in South Europe: effect of  
14 362 smoking and aging. *Photodermatol Photoimmunol Photomed* 2012; 28: 159-61.  
15  
16 363 31. Jeong BY, Lim MK, Yun EH, *et al.* Tolerance for and potential indicators of second-hand smoke  
17 364 exposure among nonsmokers: a comparison of self-reported and cotinine verified second-hand smoke  
18 365 exposure based on nationally representative data. *Prev Med* 2014; 67: 280-7.  
19  
20 366 32. Jung S, Lee IS, Kim SB, *et al.* Urine cotinine for assessing tobacco smoke exposure in Korea: Analysis  
21 367 of the Korea National Health and Nutrition Examination Survey (KNHANES). *Tuberc Respir Dis*  
22 368 *(Seoul)* 2012; 73: 210-8.  
23  
24 369 33. Florescu A, Ferrence R, Einarson T, *et al.* Methods for quantification of exposure to cigarette smoking  
25 370 and environmental tobacco smoke: focus on developmental toxicology. *Ther Drug Monit* 2009; 31: 14-  
26 371 30.  
27  
28 372 34. Kim Y, Choi YJ, Oh SW, *et al.* Discrepancy between self-reported and urine-cotinine verified smoking  
29 373 status among Korean male adults: analysis of health check-up data from a single private hospital.  
30 374 *Korean J Fam Med* 2016; 37: 171-6.  
31  
32 375 35. Park MB, Nam EW, Lee SK, *et al.* The correlation of different cotinine levels with questionnaire  
33 376 results: A comparative study for different measurement methods of the adolescent smoking rate in  
34 377 Korea. *Asia Pac J Public Health* 2015; 27: 542-50.  
35  
36 378 36. Haufroid V, Lison D. Urinary cotinine as a tobacco-smoke exposure index: a minireview. *Int Arch*  
37 379 *Occup Environ Health* 1998; 71: 162-8.  
38  
39 380 37. Paul G, Brehm JM, Alcorn JF, *et al.* Vitamin D and asthma. *Am J Respir Crit Care Med* 2012; 185:  
40 381 124-32.  
41  
42 382 38. Bozzetto S, Carraro S, Giordano G, *et al.* Asthma, allergy and respiratory infections: the vitamin D  
43 383 hypothesis. *Allergy* 2012; 67: 10-7.  
44  
45  
46  
47  
48  
49  
50  
51  
52  
53  
54  
55  
56  
57  
58  
59  
60

- 1  
2  
3  
4 384 39. Bath-hextall FJ, Jenkinson C, Humphreys R, *et al*. Dietary supplements for established atopic eczema.  
5  
6 385 *Cochrane Database Syst Rev* 2012; 15: CD005205  
7  
8 386 40. Hollams EM, Hart PH, Holt BJ, *et al*. Vitamin D and atopy and asthma phenotypes in children: a  
9  
10 387 longitudinal cohort study. *Eur respire J* 2011; 38: 1320-7.  
11  
12 388 41. van der Mei IA, Ponsonby AL, Dwyer T, *et al*. Vitamin D levels in people with multiple sclerosis and  
13  
14 389 community controls in Tasmania Australia. *J Neurol* 2007; 254: 581-90.  
15  
16 390  
17 391

For peer review only

1  
2  
3  
4  
5  
6  
7  
8  
9  
10  
11  
12  
13  
14  
15  
16  
17  
18  
19  
20  
21  
22  
23  
24  
25  
26  
27  
28  
29  
30  
31  
32  
33  
34  
35  
36  
37  
38  
39  
40  
41  
42  
43  
44  
45  
46  
47  
48  
49  
50  
51  
52  
53  
54  
55  
56  
57  
58  
59  
60

392 **FIGURE LEGENDS**

393 **Figure** Serum 25OHD levels: histogram

For peer review only

394 **Table 1. Characteristics of the study population. Univariate and multivariate analyses of factors associated with serum 25(OH)D**

|                     | Total (n=2515) | Vit D Level           |                                |                        | P value |
|---------------------|----------------|-----------------------|--------------------------------|------------------------|---------|
|                     |                | Deficiency (<20ng/ml) | Insufficiency (≥20 - <30ng/ml) | Sufficiency (≥30ng/ml) |         |
| Age                 | 14.39±0.07     | 14.66±0.08            | 13.46±0.15                     | 14.07±0.52             | <.0001  |
| Sex                 |                |                       |                                |                        |         |
| Male                | 1314 (53.39)   | 914 (51.20)           | 359 (59.74)                    | 41 (71.46)             | 0.0031  |
| Female              | 1201 (46.61)   | 929 (37.45)           | 254 (40.26)                    | 18 (28.54)             |         |
| Region of residence |                |                       |                                |                        |         |
| Urban               | 1709 (71.98)   | 1297 (73.59)          | 379 (67.94)                    | 33 (50.84)             | 0.0108  |
| Rural               | 806 (28.02)    | 546 (26.41)           | 234 (32.06)                    | 26 (49.16)             |         |
| Regular exercise    |                |                       |                                |                        |         |
| No                  | 1861 (73.83)   | 1375 (74.94)          | 449 (70.20)                    | 37 (69.98)             | 0.1912  |
| Yes                 | 654 (26.17)    | 468 (25.06)           | 164 (29.80)                    | 22 (30.02)             |         |
| Regular walking     |                |                       |                                |                        |         |
| No                  | 1354 (53.23)   | 981 (52.98)           | 339 (54.37)                    | 34 (50.44)             | 0.8708  |
| Yes                 | 1161 (46.77)   | 862 (47.02)           | 274 (45.63)                    | 25 (49.56)             |         |
| Income              |                |                       |                                |                        |         |
| lowest              | 306 (13.87)    | 229 (14.33)           | 71 (12.78)                     | 6 (6.83)               | 0.0996  |
| lower middle        | 604 (27.04)    | 452 (27.66)           | 133 (24.41)                    | 19 (31.94)             |         |
| higher middle       | 803 (30.39)    | 580 (30.92)           | 210 (29.54)                    | 13 (17.44)             |         |
| highest             | 802 (28.71)    | 582 (27.09)           | 199 (33.27)                    | 21 (43.79)             |         |
| Season              |                |                       |                                |                        |         |
| April - October     | 1465 (58.38)   | 930 (51.36)           | 485 (81.49)                    | 50 (82.62)             | <.0001  |
| November - March    | 1050 (41.62)   | 913 (48.64)           | 128 (18.51)                    | 9 (17.38)              |         |

|                   |              |              |              |              |        |
|-------------------|--------------|--------------|--------------|--------------|--------|
| BMI               | 20.88 ± 0.10 | 21.12 ± 0.13 | 20.08 ± 0.19 | 20.12 ± 0.47 | <.0001 |
| Smoking           |              |              |              |              |        |
| Active            | 382 (18.22)  | 293 (19.08)  | 75 (13.99)   | 14 (32.22)   | 0.0075 |
| Passive           | 1200 (43.39) | 913 (44.36)  | 261 (39.98)  | 26 (42.56)   |        |
| No                | 933 (38.40)  | 637 (36.56)  | 277 (46.03)  | 19 (25.22)   |        |
| Atopic dermatitis |              |              |              |              |        |
| No                | 2247 (89.44) | 1648 (88.99) | 546 (90.83)  | 53 (92.28)   | 0.4675 |
| Yes               | 268 (10.56)  | 195 (11.01)  | 67 (9.17)    | 6 (7.72)     |        |
| Asthma            |              |              |              |              |        |
| No                | 2412 (95.87) | 1771 (95.85) | 583 (95.68)  | 58 (99.26)   | 0.5376 |
| Yes               | 103 (4.13)   | 72 (4.15)    | 30 (4.32)    | 1 (0.74)     |        |

Data are presented as mean±SE, n (weighted %).  
 Statistics were carried out using Rao-Scott Chi-square test.

395  
 396

397 **Table 2. Vitamin D levels in the study population**

|                     | Vit D      | <i>P</i> value <sup>(1)</sup> | <i>P</i> value <sup>(2)</sup>        |
|---------------------|------------|-------------------------------|--------------------------------------|
| Total               | 16.68±0.17 |                               |                                      |
| Sex                 |            |                               |                                      |
| Male                | 17.26±0.22 | <.0001                        |                                      |
| Female              | 16.01±0.21 |                               |                                      |
| Region of residence |            |                               |                                      |
| Urban               | 16.34±0.20 | 0.0024                        |                                      |
| Rural               | 17.53±0.34 |                               |                                      |
| Regular exercise    |            |                               |                                      |
| No                  | 16.52±0.18 | 0.0565                        |                                      |
| Yes                 | 17.13±0.31 |                               |                                      |
| Regular walking     |            |                               |                                      |
| No                  | 16.62±0.21 | 0.687                         |                                      |
| Yes                 | 16.74±0.24 |                               |                                      |
| Income              |            |                               |                                      |
| lowest              | 16.09±0.41 | 0.0043                        | lowest vs highest : 0.0218           |
| lower middle        | 16.63±0.29 |                               | lower middle vs highest :<br>0.1576  |
| higher middle       | 16.47±0.24 |                               | higher middle vs highest :<br>0.0449 |
| highest             | 17.22±0.31 |                               |                                      |
| Season              |            |                               |                                      |
| April - October     | 18.11±0.21 | <.0001                        |                                      |
| November - March    | 14.67±0.21 |                               |                                      |
| Smoking             |            |                               |                                      |
| Active              | 16.52±0.42 | 0.0062                        | active vs passive : 0.9439           |
| Passive             | 16.37±0.23 |                               | active vs no : 0.4260                |
| No                  | 17.10±0.23 |                               | passive vs no : 0.0382               |
| Atopic dermatitis   |            |                               |                                      |
| No                  | 16.68±0.18 | 0.8887                        |                                      |
| Yes                 | 16.63±0.32 |                               |                                      |
| Asthma              |            |                               |                                      |
| No                  | 16.70±0.18 | 0.4507                        |                                      |
| Yes                 | 16.22±0.62 |                               |                                      |

Data are presented as mean±SE, n (weighted %).

*P* value (1): t-test or anova(variable : Income, Smoking) result

*P* value (2): multiple comparison : Tukey-Kramer

398



399 **Table 3. Multivariate linear regression analyses of serum 25(OH)D levels**

|                     | Coefficient | 95% Confidence interval | <i>P</i> value |
|---------------------|-------------|-------------------------|----------------|
| Age                 | -0.52       | -0.65 , -0.40           | <.0001         |
| Sex                 |             |                         |                |
| Male                | reference   |                         | <.0001         |
| Female              | -1.40       | -1.88 , -0.91           |                |
| Region of residence |             |                         |                |
| Urban               | -0.85       | -1.55 , -0.14           | 0.0189         |
| Rural               | reference   |                         |                |
| BMI                 | -0.10       | -0.17 , -0.03           | 0.0034         |
| Smoking             |             |                         |                |
| Active              | 0.47        | -0.42 , 1.36            | 0.3017         |
| Passive             | -0.04       | -0.62 , 0.53            | 0.8842         |
| No                  | reference   |                         |                |
| Season              |             |                         |                |
| April - October     | reference   |                         | <.0001         |
| November - March    | -3.38       | -3.97 , -2.79           |                |

Statistics were carried out using Multivariable linear regression.

Model: adjusted for age, sex, region, BMI, smoking, Season.

400

401 **Table 4. Multivariate ordinal logistic regression analyses of categories of serum 25(OH)D levels**

|                     | Odds ratio | 95% Confidence interval | <i>P</i> value |
|---------------------|------------|-------------------------|----------------|
| Age                 | 1.22       | 1.13 , 1.31             | <.0001         |
| Sex                 |            |                         |                |
| Male                | reference  |                         | 0.0002         |
| Female              | 1.68       | 1.28 , 2.21             |                |
| Region of residence |            |                         |                |
| Urban               | 1.32       | 0.96 , 1.81             | 0.0890         |
| Rural               | reference  |                         |                |
| BMI                 | 1.07       | 1.03 , 1.12             | 0.0011         |
| Smoking             |            |                         |                |
| Active              | 0.89       | 0.54 , 1.47             | 0.6539         |
| Passive             | 1.01       | 0.74 , 1.37             | 0.9535         |
| No                  | reference  |                         |                |
| Season              |            |                         |                |
| April - October     | reference  |                         |                |
| November - March    | 4.49       | 3.25 , 6.22             | <.0001         |

Data are presented OR(95%CI).

Statistics were carried out using Logistic regression.

Serum 25(OH)D levels were categorized into 3 ordinal categories of vitamin D status

(<20: Deficiency, ≥20 - <30: Insufficiency, 30≥: Sufficiency)

Model: adjusted for age, sex, region, BMI, smoking, Season.

402

403

404

405

406

407

408

409

410 Table 5. ORs and 95% CIs of AD and asthma according to serum 25(OH)D levels

|                   |               | Unadjusted          |         | Adjusted            |         |
|-------------------|---------------|---------------------|---------|---------------------|---------|
|                   |               | OR (95%CI)          | P value | OR (95%CI)          | P value |
| Atopic dermatitis | Vit D Level   |                     |         |                     |         |
|                   | Sufficiency   | reference           |         | reference           |         |
|                   | Insufficiency | 1.21 (0.43 , 3.39)  | 0.7228  | 1.14 (0.41 , 3.19)  | 0.8078  |
|                   | Deficiency    | 1.48 (0.54 , 4.02)  | 0.4441  | 1.52 (0.54 , 4.22)  | 0.4271  |
| Asthma            | Vit D Level   |                     |         |                     |         |
|                   | Sufficiency   | reference           |         | reference           |         |
|                   | Insufficiency | 6.02 (0.75 , 48.25) | 0.0908  | 4.87 (0.61 , 39.05) | 0.1360  |
|                   | Deficiency    | 5.79 (0.76 , 43.96) | 0.0898  | 5.31 (0.71 , 39.86) | 0.1042  |

Data are presented OR(95%CI).

Statistics were carried out using Logistic regression.

Adjusted for age, sex, region, BMI, smoking, Season.

411

412 **Table 6. The estimated mean serum 25(OH)D levels and their differences according to AD and asthma**

|                   | Unadjusted     |                             |                | Adjusted       |                             |                |
|-------------------|----------------|-----------------------------|----------------|----------------|-----------------------------|----------------|
|                   | Estimated mean | Difference (Estimated mean) | <i>P</i> value | Estimated mean | Difference (Estimated mean) | <i>P</i> value |
| Atopic dermatitis |                |                             |                |                |                             |                |
| Yes               | 16.68 ± 0.18   | 0.05 ± 0.34                 | 0.8887         | 16.87 ± 0.16   | 0.19 ± 0.33                 | 0.5776         |
| No                | 16.63 ± 0.32   |                             |                | 16.68 ± 0.32   |                             |                |
| Asthma            |                |                             |                |                |                             |                |
| Yes               | 16.70 ± 0.18   | 0.48 ± 0.63                 | 0.4507         | 16.88 ± 0.15   | 0.72 ± 0.48                 | 0.1313         |
| No                | 16.22 ± 0.62   |                             |                | 16.15 ± 0.47   |                             |                |

Data are presented as numeric, mean±SD.

Statistics were carried out using Simple linear regression and Multivariable linear regression.

Adjusted for age, sex, region, BMI, smoking, Season.

413

414

415

1  
2  
3  
4  
5  
6  
7  
8  
9  
10  
11  
12  
13  
14  
15  
16  
17  
18  
19  
20  
21  
22  
23  
24  
25  
26  
27  
28  
29  
30  
31  
32  
33  
34  
35  
36  
37  
38  
39  
40  
41  
42  
43  
44  
45  
46  
47  
48  
49  
50  
51  
52  
53  
54  
55  
56  
57  
58  
59  
60

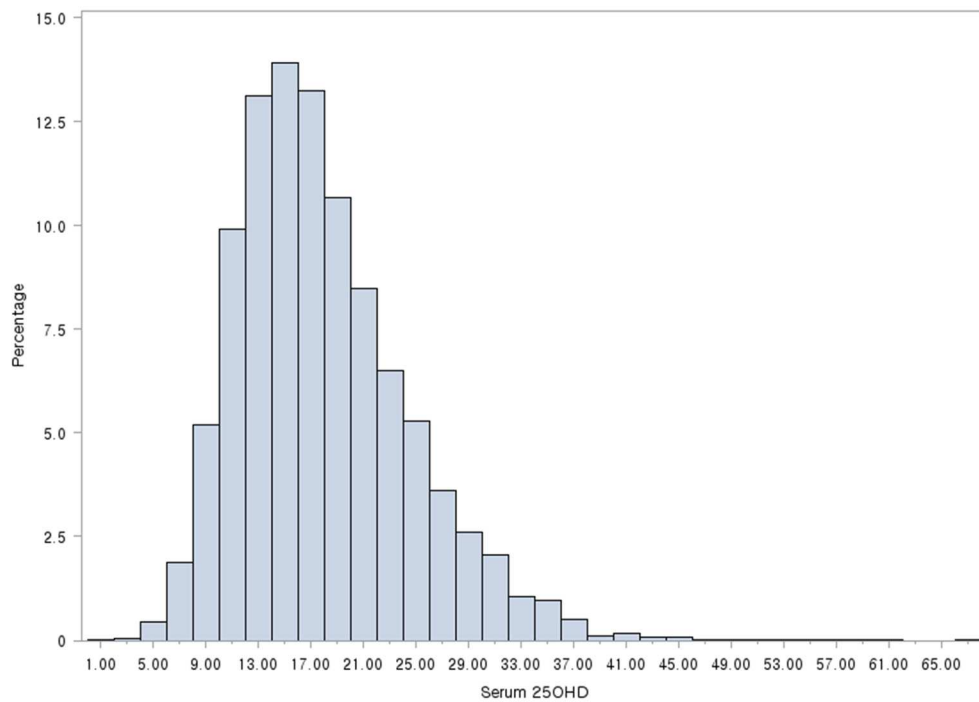

Figure Serum 25OHD levels: histogram

190x142mm (300 x 300 DPI)

ew only

**STROBE 2007 (v4) checklist of items to be included in reports of observational studies in epidemiology\***  
**Checklist for cohort, case-control, and cross-sectional studies (combined)**

| Section/Topic             | Item # | Recommendation                                                                                                                                                                                                                                                                                                                                                                                                                                                         | Reported on page # |
|---------------------------|--------|------------------------------------------------------------------------------------------------------------------------------------------------------------------------------------------------------------------------------------------------------------------------------------------------------------------------------------------------------------------------------------------------------------------------------------------------------------------------|--------------------|
| Title and abstract        | 1      | (a) Indicate the study's design with a commonly used term in the title or the abstract                                                                                                                                                                                                                                                                                                                                                                                 | 1                  |
|                           |        | (b) Provide in the abstract an informative and balanced summary of what was done and what was found                                                                                                                                                                                                                                                                                                                                                                    | 2                  |
| <b>Introduction</b>       |        |                                                                                                                                                                                                                                                                                                                                                                                                                                                                        |                    |
| Background/rationale      | 2      | Explain the scientific background and rationale for the investigation being reported                                                                                                                                                                                                                                                                                                                                                                                   | 4                  |
| Objectives                | 3      | State specific objectives, including any pre-specified hypotheses                                                                                                                                                                                                                                                                                                                                                                                                      | 4                  |
| <b>Methods</b>            |        |                                                                                                                                                                                                                                                                                                                                                                                                                                                                        |                    |
| Study design              | 4      | Present key elements of study design early in the paper                                                                                                                                                                                                                                                                                                                                                                                                                | 5                  |
| Setting                   | 5      | Describe the setting, locations, and relevant dates, including periods of recruitment, exposure, follow-up, and data collection                                                                                                                                                                                                                                                                                                                                        | 5                  |
| Participants              | 6      | (a) <i>Cohort study</i> —Give the eligibility criteria, and the sources and methods of selection of participants. Describe methods of follow-up<br><i>Case-control study</i> —Give the eligibility criteria, and the sources and methods of case ascertainment and control selection. Give the rationale for the choice of cases and controls<br><i>Cross-sectional study</i> —Give the eligibility criteria, and the sources and methods of selection of participants | 5                  |
|                           |        | (b) <i>Cohort study</i> —For matched studies, give matching criteria and number of exposed and unexposed<br><i>Case-control study</i> —For matched studies, give matching criteria and the number of controls per case                                                                                                                                                                                                                                                 |                    |
| Variables                 | 7      | Clearly define all outcomes, exposures, predictors, potential confounders, and effect modifiers. Give diagnostic criteria, if applicable                                                                                                                                                                                                                                                                                                                               | 5,6                |
| Data sources/ measurement | 8*     | For each variable of interest, give sources of data and details of methods of assessment (measurement). Describe comparability of assessment methods if there is more than one group                                                                                                                                                                                                                                                                                   | 5,6                |
| Bias                      | 9      | Describe any efforts to address potential sources of bias                                                                                                                                                                                                                                                                                                                                                                                                              | 6                  |
| Study size                | 10     | Explain how the study size was arrived at                                                                                                                                                                                                                                                                                                                                                                                                                              | 5                  |
| Quantitative variables    | 11     | Explain how quantitative variables were handled in the analyses. If applicable, describe which groupings were chosen and why                                                                                                                                                                                                                                                                                                                                           | 5,6                |
| Statistical methods       | 12     | (a) Describe all statistical methods, including those used to control for confounding                                                                                                                                                                                                                                                                                                                                                                                  | 6,7                |
|                           |        | (b) Describe any methods used to examine subgroups and interactions                                                                                                                                                                                                                                                                                                                                                                                                    | 6,7                |
|                           |        | (c) Explain how missing data were addressed                                                                                                                                                                                                                                                                                                                                                                                                                            | 6,7                |
|                           |        | (d) <i>Cohort study</i> —If applicable, explain how loss to follow-up was addressed<br><i>Case-control study</i> —If applicable, explain how matching of cases and controls was addressed                                                                                                                                                                                                                                                                              | 6,7                |

|                          |     |                                                                                                                                                                                                                                                                                                                                                                                                               |       |
|--------------------------|-----|---------------------------------------------------------------------------------------------------------------------------------------------------------------------------------------------------------------------------------------------------------------------------------------------------------------------------------------------------------------------------------------------------------------|-------|
|                          |     | <i>Cross-sectional study</i> —If applicable, describe analytical methods taking account of sampling strategy                                                                                                                                                                                                                                                                                                  |       |
|                          |     | (e) Describe any sensitivity analyses                                                                                                                                                                                                                                                                                                                                                                         | 6,7   |
| <b>Results</b>           |     |                                                                                                                                                                                                                                                                                                                                                                                                               |       |
| Participants             | 13* | (a) Report numbers of individuals at each stage of study—eg numbers potentially eligible, examined for eligibility, confirmed eligible, included in the study, completing follow-up, and analysed<br>(b) Give reasons for non-participation at each stage<br>(c) Consider use of a flow diagram                                                                                                               | 8     |
| Descriptive data         | 14* | (a) Give characteristics of study participants (eg demographic, clinical, social) and information on exposures and potential confounders<br>(b) Indicate number of participants with missing data for each variable of interest<br>(c) <i>Cohort study</i> —Summarise follow-up time (eg, average and total amount)                                                                                           | 8     |
| Outcome data             | 15* | <i>Cohort study</i> —Report numbers of outcome events or summary measures over time<br><i>Case-control study</i> —Report numbers in each exposure category, or summary measures of exposure<br><i>Cross-sectional study</i> —Report numbers of outcome events or summary measures                                                                                                                             | 8     |
| Main results             | 16  | (a) Give unadjusted estimates and, if applicable, confounder-adjusted estimates and their precision (eg, 95% confidence interval). Make clear which confounders were adjusted for and why they were included<br>(b) Report category boundaries when continuous variables were categorized<br>(c) If relevant, consider translating estimates of relative risk into absolute risk for a meaningful time period | 8,9   |
| Other analyses           | 17  | Report other analyses done—eg analyses of subgroups and interactions, and sensitivity analyses                                                                                                                                                                                                                                                                                                                |       |
| <b>Discussion</b>        |     |                                                                                                                                                                                                                                                                                                                                                                                                               |       |
| Key results              | 18  | Summarise key results with reference to study objectives                                                                                                                                                                                                                                                                                                                                                      | 12,13 |
| Limitations              | 19  | Discuss limitations of the study, taking into account sources of potential bias or imprecision. Discuss both direction and magnitude of any potential bias                                                                                                                                                                                                                                                    | 12    |
| Interpretation           | 20  | Give a cautious overall interpretation of results considering objectives, limitations, multiplicity of analyses, results from similar studies, and other relevant evidence                                                                                                                                                                                                                                    | 10-13 |
| Generalisability         | 21  | Discuss the generalisability (external validity) of the study results                                                                                                                                                                                                                                                                                                                                         | 12,13 |
| <b>Other information</b> |     |                                                                                                                                                                                                                                                                                                                                                                                                               |       |
| Funding                  | 22  | Give the source of funding and the role of the funders for the present study and, if applicable, for the original study on which the present article is based                                                                                                                                                                                                                                                 | 14    |

\*Give information separately for cases and controls in case-control studies and, if applicable, for exposed and unexposed groups in cohort and cross-sectional studies.

**Note:** An Explanation and Elaboration article discusses each checklist item and gives methodological background and published examples of transparent reporting. The STROBE checklist is best used in conjunction with this article (freely available on the Web sites of PLoS Medicine at <http://www.plosmedicine.org/>, Annals of Internal Medicine at <http://www.annals.org/>, and Epidemiology at <http://www.epidem.com/>). Information on the STROBE Initiative is available at [www.strobe-statement.org](http://www.strobe-statement.org).
